# Supplementary material for: High-Throughput Antibody Profiling Identifies Targets of Protective Immunity against P. falciparum Malaria in Thailand
Source: Biomolecules. 2023 Aug 18;13(8):1267. doi: 10.3390/biom13081267 (PMC10452476; doi:10.3390/biom13081267)
Supplement: Supplementary file 1 [file biomolecules-13-01267-s001.zip]

Archive with 5 entries (5 files):
- Figure S1.pdf
- Figure S2.pdf
- Table S1 (all antigens seroprevalence).xlsx
- Table S2 (all antigens univariate).xlsx
- Table S3 (all antigens multivariate).xlsx
