# Supplementary material for: High-Throughput Antibody Profiling Identifies Targets of Protective Immunity against P. falciparum Malaria in Thailand
Source: Biomolecules. 2023 Aug 18;13(8):1267. doi: 10.3390/biom13081267 (PMC10452476; doi:10.3390/biom13081267)
Supplement: Supplementary file 1 [file biomolecules-13-01267-s001.zip › Table S1 (all antigens seroprevalence).xlsx]

## Sheet: Sheet1
Table S1: 691 P.falciparum Protein library assessed in this study
Product ID	Product Description	GeneID and Domain	Expressed region (aa)	Seroprevalence (%)	Family
MSP10_1-1	merozoite surface protein 10	PF3D7_0620400	29-188	84.2105	BSP
MSP10_1-2	merozoite surface protein 10	PF3D7_0620400	189-348	81.5789	BSP
MSP10_1-3	merozoite surface protein 10	PF3D7_0620400	349-507	92.1053	BSP
MSP10_2-1	merozoite surface protein 10	PF3D7_0620400	110-268	68.4211	BSP
MSP10_2-2	merozoite surface protein 10	PF3D7_0620400	268-428	100	BSP
MSP10_full	merozoite surface protein 10	PF3D7_0620400	29-507	100	BSP
PF14-3	Plasmodium exported protein (PHISTb), unknown function	PF3D7_1476200	299-512	97.3684	BSP
WE1	conserved Plasmodium protein, unknown function	PF3D7_1310200	26-109	28.9474	BSP
WE10	rhoptry neck protein 12	PF3D7_1017100	26-310	86.8421	BSP
WE11	p1/s1 nuclease, putative	PF3D7_1412000	22-320	39.4737	BSP
WE14	merozoite surface protein 3	PF3D7_1035400	27-354	94.7368	BSP
WE15	6-cysteine protein	PF3D7_0508000	22-327	84.2105	BSP
WE16	merozoite surface protein 7	PF3D7_1335100	24-351	94.7368	BSP
WE17	thrombospondin-related apical membrane protein	PF3D7_1218000	26-309	55.2632	BSP
WE18	merozoite surface protein 6	PF3D7_1035500	23-371	71.0526	BSP
WE19	shewanella-like protein phosphatase 1, putative	PF3D7_1469200	25-358	42.1053	BSP
WE20	cysteine-rich protective antigen	PF3D7_0423800	27-362	81.5789	BSP
WE21	MSP7-like protein	PF3D7_1335000	23-380	92.1053	BSP
WE22	6-cysteine protein P41	PF3D7_0404900	21-378	57.8947	BSP
WE23	6-cysteine protein P12p	PF3D7_0612800	21-352	60.5263	BSP
WE27	StAR-related lipid transfer protein	PF3D7_0104200	25-424	92.1053	BSP
WE29	merozoite TRAP-like protein	PF3D7_1028700	1-432	57.8947	BSP
WE3	merozoite surface protein 2	PF3D7_0206800	26-249	39.4737	BSP
WE31	merozoite surface protein 10 (native codon)	PF3D7_0620400	29-506	94.7368	BSP
WE33	reticulocyte binding protein homologue 5	PF3D7_0424100	26-526	55.2632	BSP
WE34	probable protein, unknown function	PF3D7_1035100	27-561	92.1053	BSP
WE35	merozoites-associated armadillo repeats protein	PF3D7_1035900	23-566	78.9474	BSP
WE36	plasmepsin X	PF3D7_0808200	36-573	73.6842	BSP
WE37	merozoite surface protein 8	PF3D7_0502400	27-573	89.4737	BSP
WE38	conserved protein, unknown function	PF3D7_0909600	22-604	52.6316	BSP
WE4	secreted protein with altered thrombospondin repeat domain	PF3D7_0212600	23-250	50	BSP
WE41	apical membrane antigen 1	PF3D7_1133400	26-546	86.8421	BSP
WE42	apical sushi protein	PF3D7_0405900	22-711	68.4211	BSP
WE43	GPI-anchored micronemal antigen	PF3D7_0828800	25-714	92.1053	BSP
WE44	rhomboid protease ROM4	PF3D7_0506900	17-759	36.8421	BSP
WE45	merozoite surface protein 9	PF3D7_1228600	25-743	84.2105	BSP
WE46	duffy binding-like merozoite surface protein 2	PF3D7_1036300	30-762	23.6842	BSP
WE47	6-cysteine protein P92	PF3D7_1364100	28-772	47.3684	BSP
WE48	rhoptry-associated membrane antigen	PF3D7_0707300	18-786	97.3684	BSP
WE49	duffy binding-like merozoite surface protein	PF3D7_1035700	26-697	86.8421	BSP
WE5	rhoptry associated adhesin	PF3D7_1012200	22-267	36.8421	BSP
WE50.1	glutamate-rich protein GLURP	PF3D7_1035300	34-459	86.8421	BSP
WE6	MSP7-like protein	PF3D7_1334800	23-281	63.1579	BSP
WE65	serine repeat antigen 5	PF3D7_0207600	997	92.1053	BSP
WE66	rhoptry neck protein 6	PF3D7_0214900	950	21.0526	BSP
WE67	surface protein P113	PF3D7_1420700	969	76.3158	BSP
WE68	surface-related antigen SRA	PF3D7_1431400	990	63.1579	BSP
WE69	CSC1-like protein, putative	PF3D7_1250200	1039	60.5263	BSP
WE7	VFT protein	PF3D7_0606800	24-299	78.9474	BSP
WE70	Rh5 interacting protein	PF3D7_0323400	1086	50	BSP
WE71	EF-hand calcium-binding domain-containing protein, putative	PF3D7_1463900	1071	26.3158	BSP
WE72	erythrocyte binding antigen-140	PF3D7_1301600	1210	10.5263	BSP
WE73.1	AAA family ATPase, CDC48 subfamily	PF3D7_0711000	1229	60.5263	BSP
WE74.1	conserved protein, unknown function	PF3D7_0811600	1210	86.8421	BSP
WE74.2	conserved protein, unknown function	PF3D7_0811600	1210	36.8421	BSP
WE75.1	golgi protein 1	PF3D7_1320000	1258	44.7368	BSP
WE75.2	golgi protein 1	PF3D7_1320000	1258	84.2105	BSP
WE76.1	rhoptry protein RHOP148	PF3D7_1366400	1262	86.8421	BSP
WE76.2	rhoptry protein RHOP148	PF3D7_1366400	1262	73.6842	BSP
WE77	parasite-infected erythrocyte surface protein	PF3D7_0310400	1294	50	BSP
WE78.1	subtilisin-like protease 2	PF3D7_1136900	1341	31.5789	BSP
WE78.2	subtilisin-like protease 2	PF3D7_1136900	1341	44.7368	BSP
WE79.1	cytoadherence linked asexual protein 9	PF3D7_0935800	1340	13.1579	BSP
WE79.2	cytoadherence linked asexual protein 9	PF3D7_0935800	1340	26.3158	BSP
WE8	shewanella-like protein phosphatase 2	PF3D7_1206000	24-304	36.8421	BSP
WE80.1	high molecular weight rhoptry protein 2	PF3D7_0929400	1378	18.4211	BSP
WE80.2	high molecular weight rhoptry protein 2	PF3D7_0929400	1378	55.2632	BSP
WE81.1	cytoadherence linked asexual protein 8	PF3D7_0831600	1394	65.7895	BSP
WE81.2	cytoadherence linked asexual protein 8	PF3D7_0831600	1394	44.7368	BSP
WE83.1	cytoadherence linked asexual protein 3.1	PF3D7_0302500	1417	84.2105	BSP
WE83.2	cytoadherence linked asexual protein 3.1	PF3D7_0302500	1417	34.2105	BSP
WE84.1	cytoadherence linked asexual protein 2	PF3D7_0220800	1440	94.7368	BSP
WE84.2	cytoadherence linked asexual protein 2	PF3D7_0220800	1440	68.4211	BSP
WE85	merozoite surface protein MSA180, putative	PF3D7_1014100	1455	55.2632	BSP
WE85.1	merozoite surface protein MSA180, putative	PF3D7_1014100	1455	94.7368	BSP
WE86.1	erythrocyte binding antigen-175	PF3D7_0731500	1502	44.7368	BSP
WE86.2	erythrocyte binding antigen-175	PF3D7_0731500	1502	97.3684	BSP
WE87.1	liver stage antigen 3	PF3D7_0220000	1558	94.7368	BSP
WE87.2	liver stage antigen 3	PF3D7_0220000	1558	89.4737	BSP
WE88	erythrocyte binding antigen-181	PF3D7_0102500	1567	44.7368	BSP
WE89	reticulocyte binding protein homologue 4	PF3D7_0424200	1716	100	BSP
WE9	conserved protein, unknown function	PF3D7_1434400	28-282	55.2632	BSP
WE90.1	rhoptry neck protein 2	PF3D7_1452000	2189	55.2632	BSP
WE90.2	rhoptry neck protein 2	PF3D7_1452000	2189	0	BSP
WE91.1	conserved Plasmodium protein, unknown function	PF3D7_0715200	2206	47.3684	BSP
WE91.2	conserved Plasmodium protein, unknown function	PF3D7_0715200	2206	47.3684	BSP
WE92.1	rhoptry neck protein 3	PF3D7_1252100	2215	81.5789	BSP
WE92.2	rhoptry neck protein 3	PF3D7_1252100	2215	50	BSP
WE92.3	rhoptry neck protein 3	PF3D7_1252100	2215	84.2105	BSP
WE93.1	Sel1 repeat-containing protein, putative	PF3D7_0204100	2295	50	BSP
WE93.2	Sel1 repeat-containing protein, putative	PF3D7_0204100	2295	31.5789	BSP
WE94.1	conserved Plasmodium protein, unknown function	PF3D7_0419400	2472	84.2105	BSP
WE94.2	conserved Plasmodium protein, unknown function	PF3D7_0419400	2472	86.8421	BSP
WE98.1	rhoptry neck protein 4	PF3D7_1116000	1201	55.2632	BSP
WE98.2	serine esterase, putative	PF3D7_1116100	1830	92.1053	BSP
EH1	rhoptry-associated protein 1	PF3D7_1410400	782	13.1579	BSP
EH10	kelch domain-containing protein, putative	PF3D7_1125800	592	100	BSP
EH11	Plasmodium exported protein (PHISTc), unknown function	PF3D7_1001700	266	36.8421	BSP
EH12	Plasmodium exported protein (PHISTc), unknown function	PF3D7_0830600	456	71.0526	BSP
EH13	ubiquitin-conjugating enzyme E2, putative	PF3D7_1243700	465	10.5263	BSP
EH14	probable protein, unknown function	PF3D7_0423900	140	55.2632	BSP
EH15	conserved Plasmodium protein, unknown function	PF3D7_1351800	235	89.4737	BSP
EH16	merozoite-associated tryptophan-rich antigen	PF3D7_0102700	276	68.4211	BSP
EH17	Plasmodium exported protein, unknown function	PF3D7_0112900	188	44.7368	BSP
EH18	Plasmodium exported protein (PHISTb), unknown function	PF3D7_0424600	309	57.8947	BSP
EH19	conserved Plasmodium protein, unknown function	PF3D7_1204900	130	55.2632	BSP
EH2	rhoptry-associated protein 2	PF3D7_0501600	398	63.1579	BSP
EH20	conserved Plasmodium protein, unknown function	PF3D7_0318700	119	34.2105	BSP
EH21	PH domain-containing protein, putative	PF3D7_1361500	366	60.5263	BSP
EH22	Plasmodium exported protein, unknown function	PF3D7_1148900	89	42.1053	BSP
EH23	membrane associated histidine-rich protein 2	PF3D7_1353200	137	73.6842	BSP
EH24	EELM2 domain-containing protein, putative	PF3D7_1141800	394	26.3158	BSP
EH25	CRAL/TRIO domain-containing protein, putative	PF3D7_0920700	593	2.63158	BSP
EH26	subtilisin-like protease 1	PF3D7_0507500	688	76.3158	BSP
EH27	early transcribed membrane protein 11.2	PF3D7_1102800	94	39.4737	BSP
EH28	early transcribed membrane protein 2	PF3D7_0202500	106	42.1053	BSP
EH29	EMP1-trafficking protein	PF3D7_1002100	631	78.9474	BSP
EH29.1	EMP1-trafficking protein	PF3D7_1002100	631	89.4737	BSP
EH3	peroxiredoxin	PF3D7_1027300	393	100	BSP
EH30	conserved Plasmodium protein, unknown function	PF3D7_1140400	167	26.3158	BSP
EH31	merozoite surface protein 1	PF3D7_0930300	1720	71.0526	BSP
EH31.1	merozoite surface protein 1	PF3D7_0930300	1720	68.4211	BSP
EH32	DnaJ protein, putative	PF3D7_0201700	900	52.6316	BSP
EH33	conserved Plasmodium protein, unknown function	PF3D7_0507400	153	23.6842	BSP
EH34	claudin-like apicomplexan microneme protein, putative	PF3D7_1030200	450	68.4211	BSP
EH35	claudin-like apicomplexan microneme protein, putative	PF3D7_1030200	450	5.26316	BSP
EH36	conserved Plasmodium protein, unknown function	PF3D7_1404800	954	84.2105	BSP
EH37	conserved Plasmodium protein, unknown function	PF3D7_1404800	954	81.5789	BSP
EH38	Plasmodium exported protein, unknown function	PF3D7_1352900	582	68.4211	BSP
EH39	Plasmodium exported protein, unknown function, unspecified product	PF3D7_0730800	293	71.0526	BSP
EH4	RNA-binding protein, putative	PF3D7_1310700	143	71.0526	BSP
EH5	centrin-2	PF3D7_1446600	168	47.3684	BSP
EH6	photosensitized INA-labeled protein PHIL1	PF3D7_0109000	224	71.0526	BSP
EH7	conserved protein, unknown function	PF3D7_0819600	277	100	BSP
EH8	armadillo-domain containing rhoptry protein	PF3D7_0414900	275	57.8947	BSP
EH9	Plasmodium exported protein (PHISTb), unknown function	PF3D7_0402100	575	84.2105	BSP
PF14.1	Plasmodium exported protein (PHISTb), unknown function	PF3D7_1476200	83-298	81.5789	BSP
PF14.2	Plasmodium exported protein (PHISTb), unknown function	PF3D7_1476200	197-392	97.3684	BSP
WE12	apical merozoite protein	PF3D7_0419700	325	65.7895	BSP
WE13	6-cysteine protein P12	PF3D7_0612700	347	5.26316	BSP
WE24	merozoite surface protein 11	PF3D7_1036000	405	86.8421	BSP
WE25	parasitophorous vacuolar protein 1	PF3D7_1129100	452	84.2105	BSP
WE39	conserved Plasmodium protein, unknown function	PF3D7_1136200	679	15.7895	BSP
WE40	probable protein, unknown function	PF3D7_1035800	712	100	BSP
WE51	merozoite surface protein	PF3D7_1035600	424	44.7368	BSP
WE52	conserved Plasmodium protein, unknown function	PF3D7_1036500	555	44.7368	BSP
WE53	EGF-like membrane protein, putative	PF3D7_0623300	236	92.1053	BSP
WE54	conserved Plasmodium protein, unknown function	PF3D7_0502500	594	55.2632	BSP
WE55	conserved Plasmodium protein, unknown function	PF3D7_1105300	730	42.1053	BSP
WE56.3	rhoptry-associated leucine zipper-like protein 1	PF3D7_0722200	749	71.0526	BSP
WE57	conserved Plasmodium protein, unknown function	PF3D7_0514200	867	13.1579	BSP
WE58.1	high molecular weight rhoptry protein 3	PF3D7_0905400	897	44.7368	BSP
WE58.2	high molecular weight rhoptry protein 3	PF3D7_0905400	897	31.5789	BSP
WE59	subtilisin-like ookinete protein SOPT	PF3D7_0507300	893	73.6842	BSP
WE60	ribosome biogenesis GTPase A, putative	PF3D7_0410700	276	97.3684	BSP
WE63	translocon component PTEX150	PF3D7_1436300	993	97.3684	BSP
WE64	6-cysteine protein B9	PF3D7_0317100	969	21.0526	BSP
DC1	PfEMP1	PF3D7_0100100_DBLα0.11	68-496	5.26316	DBL
DC100	PfEMP1	PF3D7_0600400_DBLe8	483-779	97.3684	DBL
DC101	PfEMP1	PF3D7_0617400_DBLα0.21	62-465	60.5263	DBL
DC103	PfEMP1	PF3D7_0617400_DBLβ4	737-1185	31.5789	DBL
DC104	PfEMP1	PF3D7_0617400_DBLδ1	1207-1666	97.3684	DBL
DC106	PfEMP1	PF3D7_0632500_DBLα0.6	65-514	39.4737	DBL
DC108	PfEMP1	PF3D7_0632500_DBLβ5	831-1301	92.1053	DBL
DC109	PfEMP1	PF3D7_0632500_DBLγ1	1319-1687	73.6842	DBL
DC11	PfEMP1	PF3D7_0200100_DBLα0.7	65-484	52.6316	DBL
DC110	PfEMP1	PF3D7_0632500_DBLδ4	1694-2127	68.4211	DBL
DC112	PfEMP1	PF3D7_0632500_DBLe7	2417-2762	97.3684	DBL
DC113	PfEMP1	PF3D7_0632500_DBLe2	2774-3057	57.8947	DBL
DC114	PfEMP1	PF3D7_0632800_DBLα0.8	67-477	21.0526	DBL
DC116	PfEMP1	PF3D7_0632800_DBLδ1	843-1375	15.7895	DBL
DC118	PfEMP1	PF3D7_0700100_DBLα0.1	62-505	31.5789	DBL
DC120	PfEMP1	PF3D7_0700100_DBLδ1	897-1462	97.3684	DBL
DC122	PfEMP1	PF3D7_0711700_DBLα0.1	63-498	39.4737	DBL
DC124	PfEMP1	PF3D7_0711700_DBLδ1	891-1381	97.3684	DBL
DC126	PfEMP1	PF3D7_0712000_DBLα0.17	64-506	21.0526	DBL
DC128	PfEMP1	PF3D7_0712000_DBLδ1	909-1424	97.3684	DBL
DC13	PfEMP1	PF3D7_0200100_DBLγ11	827-1201	47.3684	DBL
DC130	PfEMP1	PF3D7_0712300_DBLα0.1	61-504	57.8947	DBL
DC132	PfEMP1	PF3D7_0712300_DBLδ1	866-1402	86.8421	DBL
DC134	PfEMP1	PF3D7_0712400_DBLα0.18	57-464	50	DBL
DC136	PfEMP1	PF3D7_0712400_DBLβ6	742-1194	34.2105	DBL
DC137	PfEMP1	PF3D7_0712400_DBLγ9	1208-1590	36.8421	DBL
DC138	PfEMP1	PF3D7_0712600_DBLα0.1	66-519	31.5789	DBL
DC140	PfEMP1	PF3D7_0712600_DBLδ1	895-1391	97.3684	DBL
DC142	PfEMP1	PF3D7_0712800_DBLα0.9	68-473	31.5789	DBL
DC144	PfEMP1	PF3D7_0712800_DBLδ1	839-1368	97.3684	DBL
DC146	PfEMP1	PF3D7_0712900_DBLα0.20	71-524	34.2105	DBL
DC148	PfEMP1	PF3D7_0712900_DBLδ1	897-1409	97.3684	DBL
DC150	PfEMP1	PF3D7_0733000_DBLα0.16	71-488	10.5263	DBL
DC152	PfEMP1	PF3D7_0733000_DBLδ1	904-1390	97.3684	DBL
DC154	PfEMP1	PF3D7_0733000_DBLe4	1708-2029	36.8421	DBL
DC155	PfEMP1	PF3D7_0800100_DBLα0.9	68-482	5.26316	DBL
DC157	PfEMP1	PF3D7_0800100_DBLδ1	820-1297	86.8421	DBL
DC159	PfEMP1	PF3D7_0800200_DBLα1.6	76-462	44.7368	DBL
DC16	PfEMP1	PF3D7_0223500_DBLδ1	914-1414	97.3684	DBL
DC161	PfEMP1	PF3D7_0800200_DBLβ6	747-1226	94.7368	DBL
DC162	PfEMP1	PF3D7_0800200_DBLγ14	1243-1632	68.4211	DBL
DC163	PfEMP1	PF3D7_0800200_DBLz5	1641-2069	21.0526	DBL
DC164	PfEMP1	PF3D7_0800200_DBLe4	2075-2381	31.5789	DBL
DC165	PfEMP1	PF3D7_0800300_DBLα2	74-477	34.2105	DBL
DC167	PfEMP1	PF3D7_0800300_DBLβ1	735-1187	15.7895	DBL
DC168	PfEMP1	PF3D7_0800300_DBLγ4	1205-1586	57.8947	DBL
DC169	PfEMP1	PF3D7_0800300_DBLδ1	1716-2172	94.7368	DBL
DC171	PfEMP1	PF3D7_0808600_DBLα0.15	65-505	23.6842	DBL
DC173	PfEMP1	PF3D7_0808600_DBLδ1	890-1408	97.3684	DBL
DC175	PfEMP1	PF3D7_0808700_DBLα0.2	60-492	36.8421	DBL
DC177	PfEMP1	PF3D7_0808700_DBLδ1	883-1384	42.1053	DBL
DC179	PfEMP1	PF3D7_0809100_DBLα0.12	63-479	28.9474	DBL
DC18	PfEMP1	PF3D7_0300100_DBLα0.9	68-476	28.9474	DBL
DC181	PfEMP1	PF3D7_0809100_DBLδ1	800-1309	89.4737	DBL
DC183	PfEMP1	PF3D7_0833500_DBLα0.17	66-511	34.2105	DBL
DC185	PfEMP1	PF3D7_0833500_DBLδ1	894-1425	65.7895	DBL
DC187	PfEMP1	PF3D7_0900100_DBLα0.16	63-499	15.7895	DBL
DC189	PfEMP1	PF3D7_0900100_DBLδ1	875-1408	97.3684	DBL
DC191	PfEMP1	PF3D7_0937600_DBLα1.3	68-468	28.9474	DBL
DC192	PfEMP1	PF3D7_0937600_DBLe8	473-769	97.3684	DBL
DC193	PfEMP1	PF3D7_0937800_DBLα0.1	66-503	0	DBL
DC195	PfEMP1	PF3D7_0937800_DBLδ1	885-1396	60.5263	DBL
DC197	PfEMP1	PF3D7_1000100_DBLα0.20	66-490	60.5263	DBL
DC199	PfEMP1	PF3D7_1000100_DBLδ1	877-1421	63.1579	DBL
DC20	PfEMP1	PF3D7_0300100_DBLδ1	840-1353	57.8947	DBL
DC201	PfEMP1	PF3D7_1041300_DBLα0.9	68-475	31.5789	DBL
DC203	PfEMP1	PF3D7_1041300_DBLδ1	837-1397	97.3684	DBL
DC205	PfEMP1	PF3D7_1100100_DBLα0.15	68-489	13.1579	DBL
DC207	PfEMP1	PF3D7_1100100_DBLδ1	888-1406	94.7368	DBL
DC209	PfEMP1	PF3D7_1100200_DBLα1.5	71-473	39.4737	DBL
DC211	PfEMP1	PF3D7_1100200_DBLγ12	862-1209	60.5263	DBL
DC212	PfEMP1	PF3D7_1100200_DBLδ5	1214-1629	86.8421	DBL
DC214	PfEMP1	PF3D7_1100200_DBLβ9	1922-2378	78.9474	DBL
DC215	PfEMP1	PF3D7_1150400_DBLα1.7	71-469	28.9474	DBL
DC217	PfEMP1	PF3D7_1150400_DBLβ3	728-1214	55.2632	DBL
DC218	PfEMP1	PF3D7_1150400_DBLβ6	1248-1695	81.5789	DBL
DC219	PfEMP1	PF3D7_1150400_DBLδ3	1870-2296	71.0526	DBL
DC22	PfEMP1	PF3D7_0324900_DBLα0.9	68-484	44.7368	DBL
DC221	PfEMP1	PF3D7_1200100_DBLα0.9	70-490	47.3684	DBL
DC223	PfEMP1	PF3D7_1200100_DBLδ1	830-1325	97.3684	DBL
DC225	PfEMP1	PF3D7_1200400_DBLα0.18	76-475	34.2105	DBL
DC227	PfEMP1	PF3D7_1200400_DBLβ5	750-1225	47.3684	DBL
DC228	PfEMP1	PF3D7_1200400_DBLγ14	1243-1631	63.1579	DBL
DC229	PfEMP1	PF3D7_1200400_DBLz5	1640-2062	55.2632	DBL
DC230	PfEMP1	PF3D7_1200400_DBLe4	2068-2367	47.3684	DBL
DC231	PfEMP1	PF3D7_1200600_DBLpam1	51-426	73.6842	DBL
DC232	PfEMP1	PF3D7_1200600_DBLpam2	526-957	65.7895	DBL
DC234	PfEMP1	PF3D7_1200600_DBLpam3	1212-1558	31.5789	DBL
DC235	PfEMP1	PF3D7_1200600_DBLepam4	1560-1904	10.5263	DBL
DC236	PfEMP1	PF3D7_1200600_DBLepam5	1981-2282	28.9474	DBL
DC237	PfEMP1	PF3D7_1200600_DBLe10	2322-2633	65.7895	DBL
DC238	PfEMP1	PF3D7_1219300_DBLα0.16	60-496	60.5263	DBL
DC24	PfEMP1	PF3D7_0324900_DBLδ1	828-1359	71.0526	DBL
DC240	PfEMP1	PF3D7_1219300_DBLδ1	897-1423	73.6842	DBL
DC242	PfEMP1	PF3D7_1240300_DBLα0.7	69-484	65.7895	DBL
DC244	PfEMP1	PF3D7_1240300_DBLβ8	749-1215	52.6316	DBL
DC245	PfEMP1	PF3D7_1240300_DBLδ1	1298-1813	78.9474	DBL
DC247	PfEMP1	PF3D7_1240400_DBLα0.16	61-496	21.0526	DBL
DC249	PfEMP1	PF3D7_1240400_DBLδ1	882-1427	36.8421	DBL
DC251	PfEMP1	PF3D7_1240600_DBLα0.20	63-521	47.3684	DBL
DC253	PfEMP1	PF3D7_1240600_DBLδ1	1033-1536	36.8421	DBL
DC255	PfEMP1	PF3D7_1255200_DBLα0.19	67-492	34.2105	DBL
DC257	PfEMP1	PF3D7_1255200_DBLδ1	861-1423	52.6316	DBL
DC259	PfEMP1	PF3D7_1300100_DBLα0.11	60-497	23.6842	DBL
DC26	PfEMP1	PF3D7_0400100_DBLα0.5	78-519	52.6316	DBL
DC261	PfEMP1	PF3D7_1300100_DBLδ1	851-1332	97.3684	DBL
DC263	PfEMP1	PF3D7_1300300_DBLα1.6	78-469	2.63158	DBL
DC265	PfEMP1	PF3D7_1300300_DBLβ3	748-1194	92.1053	DBL
DC266	PfEMP1	PF3D7_1300300_DBLγ12	1212-1567	73.6842	DBL
DC267	PfEMP1	PF3D7_1300300_DBLδ5	1572-1981	81.5789	DBL
DC269	PfEMP1	PF3D7_1300300_DBLβ9	2265-2726	97.3684	DBL
DC270	PfEMP1	PF3D7_1373500_DBLα0.16	62-514	15.7895	DBL
DC272	PfEMP1	PF3D7_1373500_DBLδ1	923-1404	73.6842	DBL
DC28	PfEMP1	PF3D7_0400100_DBLγ5	859-1219	71.0526	DBL
DC29	PfEMP1	PF3D7_0400100_DBLδ	1255-1804	97.3684	DBL
DC3	PfEMP1	PF3D7_0100100_DBLδ1	856-1363	97.3684	DBL
DC31	PfEMP1	PF3D7_0400400_DBLα1.2	77-474	10.5263	DBL
DC33	PfEMP1	PF3D7_0400400_DBLβ12	736-1183	65.7895	DBL
DC34	PfEMP1	PF3D7_0400400_DBLγ6	1199-1556	44.7368	DBL
DC35	PfEMP1	PF3D7_0400400_DBLγ11	1572-1931	42.1053	DBL
DC36	PfEMP1	PF3D7_0400400_DBLδ1	2099-2618	89.4737	DBL
DC38	PfEMP1	PF3D7_0412400_DBLα0.17	63-509	44.7368	DBL
DC40	PfEMP1	PF3D7_0412400_DBLδ1	914-1365	97.3684	DBL
DC42	PfEMP1	PF3D7_0412700_DBLα0.1	64-536	44.7368	DBL
DC44	PfEMP1	PF3D7_0412700_DBLδ1	893-1442	68.4211	DBL
DC46	PfEMP1	PF3D7_0412900_DBLα0.1	61-505	50	DBL
DC48	PfEMP1	PF3D7_0412900_DBLδ1	863-1448	76.3158	DBL
DC5	PfEMP1	PF3D7_0100300_DBLα1.3	68-475	39.4737	DBL
DC50	PfEMP1	PF3D7_0413100_DBLα0.1	63-509	47.3684	DBL
DC52	PfEMP1	PF3D7_0413100_DBLδ1	877-1462	63.1579	DBL
DC54	PfEMP1	PF3D7_0420700_DBLα0.1	67-507	28.9474	DBL
DC56	PfEMP1	PF3D7_0420700_DBLδ1	885-1330	89.4737	DBL
DC58	PfEMP1	PF3D7_0420900_DBLα0.1	67-507	28.9474	DBL
DC6	PfEMP1	PF3D7_0100300_DBLe8	480-776	97.3684	DBL
DC60	PfEMP1	PF3D7_0420900_DBLδ1	885-1350	94.7368	DBL
DC62	PfEMP1	PF3D7_0421100_DBLα0.8	68-472	57.8947	DBL
DC64	PfEMP1	PF3D7_0421100_DBLδ1	835-1330	92.1053	DBL
DC66	PfEMP1	PF3D7_0421300_DBLα0.24	65-490	65.7895	DBL
DC68	PfEMP1	PF3D7_0421300_DBLδ1	867-1384	65.7895	DBL
DC7	PfEMP1	PF3D7_0115700_DBLα0.5	64-497	36.8421	DBL
DC70	PfEMP1	PF3D7_0425800_DBLα1.4	73-478	23.6842	DBL
DC72	PfEMP1	PF3D7_0425800_DBLβ3	737-1221	55.2632	DBL
DC73	PfEMP1	PF3D7_0425800_DBLβ3	1237-1689	0	DBL
DC74	PfEMP1	PF3D7_0425800_DBLγ13	1709-2091	65.7895	DBL
DC75	PfEMP1	PF3D7_0425800_DBLδ1	2242-2744	84.2105	DBL
DC77	PfEMP1	PF3D7_0426000_DBLα0.14	63-488	31.5789	DBL
DC79	PfEMP1	PF3D7_0426000_DBLδ1	835-1299	97.3684	DBL
DC81	PfEMP1	PF3D7_0500100_DBLα0.11	60-497	36.8421	DBL
DC83	PfEMP1	PF3D7_0500100_DBLδ1	851-1385	73.6842	DBL
DC85	PfEMP1	PF3D7_0533100_DBLα1.4	79-474	23.6842	DBL
DC87	PfEMP1	PF3D7_0533100_DBLβ1	735-1216	52.6316	DBL
DC88	PfEMP1	PF3D7_0533100_DBLγ15	1236-1599	92.1053	DBL
DC89	PfEMP1	PF3D7_0533100_DBL5	1604-1953	26.3158	DBL
DC9	PfEMP1	PF3D7_0115700_DBLδ1	895-1372	100	DBL
DC90	PfEMP1	PF3D7_0533100_DBLγ8	2064-2438	52.6316	DBL
DC91	PfEMP1	PF3D7_0533100_DBLz1	2462-2884	39.4737	DBL
DC92	PfEMP1	PF3D7_0533100_DBLe1	2891-3162	39.4737	DBL
DC93	PfEMP1	PF3D7_0600200_DBLα2	60-452	39.4737	DBL
DC95	PfEMP1	PF3D7_0600200_DBLβ13	714-1196	73.6842	DBL
DC96	PfEMP1	PF3D7_0600200_DBLγ4	1255-1641	86.8421	DBL
DC97	PfEMP1	PF3D7_0600200_DBLz3	1650-2077	47.3684	DBL
DC98	PfEMP1	PF3D7_0600200_DBLe12	2083-2395	89.4737	DBL
DC99	PfEMP1	PF3D7_0600400_DBLα1.3	77-478	44.7368	DBL
DC10	PfEMP1	PF3D7_0115700_CIDRβ1	1373-1636	65.7895	CIDR
DC102	PfEMP1	PF3D7_0617400_CIDRα2.1	466-708	73.6842	CIDR
DC105	PfEMP1	PF3D7_0617400_CIDRβ1	1667-1919	71.0526	CIDR
DC107	PfEMP1	PF3D7_0632500_CIDRα3.2	515-819	81.5789	CIDR
DC111	PfEMP1	PF3D7_0632500_CIDRγ1	2128-2375	44.7368	CIDR
DC115	PfEMP1	PF3D7_0632800_CIDRα4	478-754	86.8421	CIDR
DC117	PfEMP1	PF3D7_0632800_CIDRβ1	1376-1629	44.7368	CIDR
DC119	PfEMP1	PF3D7_0700100_CIDRα3.1	506-819	60.5263	CIDR
DC12	PfEMP1	PF3D7_0200100_CIDRα2.2	485-742	23.6842	CIDR
DC121	PfEMP1	PF3D7_0700100_CIDRβ1	1463-1714	76.3158	CIDR
DC123	PfEMP1	PF3D7_0711700_CIDRα3.2	499-796	52.6316	CIDR
DC125	PfEMP1	PF3D7_0711700_CIDRβ6	1382-1625	63.1579	CIDR
DC127	PfEMP1	PF3D7_0712000_CIDRα3.1	507-819	81.5789	CIDR
DC131	PfEMP1	PF3D7_0712300_CIDRα0.1	505-790	73.6842	CIDR
DC133	PfEMP1	PF3D7_0712300_CIDRγ10	1403-1659	63.1579	CIDR
DC135	PfEMP1	PF3D7_0712400_CIDRα6	465-721	63.1579	CIDR
DC139	PfEMP1	PF3D7_0712600_CIDRα3.1	520-834	78.9474	CIDR
DC141	PfEMP1	PF3D7_0712600_CIDRβ1	1392-1643	84.2105	CIDR
DC143	PfEMP1	PF3D7_0712800_CIDRα2.4	474-718	73.6842	CIDR
DC145	PfEMP1	PF3D7_0712800_CIDRγ5	1369-1630	71.0526	CIDR
DC147	PfEMP1	PF3D7_0712900_CIDRα3.1	525-823	63.1579	CIDR
DC149	PfEMP1	PF3D7_0712900_CIDRβ1	1410-1665	55.2632	CIDR
DC15	PfEMP1	PF3D7_0223500_CIDRα3.4	508-826	76.3158	CIDR
DC151	PfEMP1	PF3D7_0733000_CIDRα3.4	489-815	47.3684	CIDR
DC153	PfEMP1	PF3D7_0733000_CIDRβ1	1391-1644	57.8947	CIDR
DC156	PfEMP1	PF3D7_0800100_CIDRα2.11	483-730	68.4211	CIDR
DC158	PfEMP1	PF3D7_0800100_CIDRβ1	1298-1548	65.7895	CIDR
DC160	PfEMP1	PF3D7_0800200_CIDRδ2	463-717	55.2632	CIDR
DC166	PfEMP1	PF3D7_0800300_CIDRα1.6	478-726	78.9474	CIDR
DC17	PfEMP1	PF3D7_0223500_CIDRβ1	1415-1667	44.7368	CIDR
DC170	PfEMP1	PF3D7_0800300_CIDRβ1	2173-2435	60.5263	CIDR
DC172	PfEMP1	PF3D7_0808600_CIDRα3.2	506-809	36.8421	CIDR
DC174	PfEMP1	PF3D7_0808600_CIDRγ2	1409-1667	39.4737	CIDR
DC176	PfEMP1	PF3D7_0808700_CIDRα3.1	493-777	73.6842	CIDR
DC178	PfEMP1	PF3D7_0808700_CIDRβ1	1385-1652	47.3684	CIDR
DC180	PfEMP1	PF3D7_0809100_CIDRα2.2	480-737	78.9474	CIDR
DC182	PfEMP1	PF3D7_0809100_CIDRβ1	1310-1567	81.5789	CIDR
DC184	PfEMP1	PF3D7_0833500_CIDRα3.1	512-822	57.8947	CIDR
DC186	PfEMP1	PF3D7_0833500_CIDRβ1	1426-1685	57.8947	CIDR
DC188	PfEMP1	PF3D7_0900100_CIDRα3.4	500-795	68.4211	CIDR
DC19	PfEMP1	PF3D7_0300100_CIDRα2.4	477-729	52.6316	CIDR
DC190	PfEMP1	PF3D7_0900100_CIDRγ12	1409-1683	44.7368	CIDR
DC194	PfEMP1	PF3D7_0937800_CIDRα3.1	504-805	73.6842	CIDR
DC196	PfEMP1	PF3D7_0937800_CIDRγ5	1397-1658	60.5263	CIDR
DC198	PfEMP1	PF3D7_1000100_CIDRα3.1	491-808	55.2632	CIDR
DC2	PfEMP1	PF3D7_0100100_CIDRα2.8	497-760	60.5263	CIDR
DC200	PfEMP1	PF3D7_1000100_CIDRγ4	1422-1688	36.8421	CIDR
DC202	PfEMP1	PF3D7_1041300_CIDRα2.7	476-746	73.6842	CIDR
DC204	PfEMP1	PF3D7_1041300_CIDRβ1	1398-1653	57.8947	CIDR
DC206	PfEMP1	PF3D7_1100100_CIDRα3.2	490-804	84.2105	CIDR
DC208	PfEMP1	PF3D7_1100100_CIDRβ1	1407-1659	78.9474	CIDR
DC21	PfEMP1	PF3D7_0300100_CIDRβ1	1354-1613	42.1053	CIDR
DC210	PfEMP1	PF3D7_1100200_CIDRγ3	474-728	47.3684	CIDR
DC213	PfEMP1	PF3D7_1100200_CIDRβ4	1630-1885	78.9474	CIDR
DC216	PfEMP1	PF3D7_1150400_CIDRα1.4	470-719	81.5789	CIDR
DC220	PfEMP1	PF3D7_1150400_CIDRγ2	2297-2554	52.6316	CIDR
DC222	PfEMP1	PF3D7_1200100_CIDRα2.2	491-744	52.6316	CIDR
DC224	PfEMP1	PF3D7_1200100_CIDRβ1	1326-1573	63.1579	CIDR
DC226	PfEMP1	PF3D7_1200400_CIDRα5	476-728	89.4737	CIDR
DC23	PfEMP1	PF3D7_0324900_CIDRα2.1	485-736	73.6842	CIDR
DC233	PfEMP1	PF3D7_1200600_CIDRpam	966-1193	39.4737	CIDR
DC239	PfEMP1	PF3D7_1219300_CIDRα3.4	497-797	68.4211	CIDR
DC241	PfEMP1	PF3D7_1219300_CIDRγ12	1424-1689	36.8421	CIDR
DC243	PfEMP1	PF3D7_1240300_CIDRα4	485-742	73.6842	CIDR
DC246	PfEMP1	PF3D7_1240300_CIDRβ1	1814-2071	63.1579	CIDR
DC248	PfEMP1	PF3D7_1240400_CIDRα3.4	497-799	52.6316	CIDR
DC25	PfEMP1	PF3D7_0324900_CIDRβ7	1360-1612	39.4737	CIDR
DC250	PfEMP1	PF3D7_1240400_CIDRβ1	1428-1679	57.8947	CIDR
DC252	PfEMP1	PF3D7_1240600_CIDRα3.1	522-933	71.0526	CIDR
DC254	PfEMP1	PF3D7_1240600_CIDRβ1	1537-1804	78.9474	CIDR
DC256	PfEMP1	PF3D7_1255200_CIDRα2.3	493-764	60.5263	CIDR
DC258	PfEMP1	PF3D7_1255200_CIDRβ1	1424-1681	47.3684	CIDR
DC260	PfEMP1	PF3D7_1300100_CIDRα2.4	498-754	44.7368	CIDR
DC262	PfEMP1	PF3D7_1300100_CIDRβ1	1333-1586	63.1579	CIDR
DC264	PfEMP1	PF3D7_1300300_CIDRδ1	470-724	44.7368	CIDR
DC268	PfEMP1	PF3D7_1300300_CIDRβ3	1982-2236	68.4211	CIDR
DC27	PfEMP1	PF3D7_0400100_CIDRα2.10	520-803	84.2105	CIDR
DC271	PfEMP1	PF3D7_1373500_CIDRα3.4	515-834	78.9474	CIDR
DC273	PfEMP1	PF3D7_1373500_CIDRβ6	1405-1658	28.9474	CIDR
DC30	PfEMP1	PF3D7_0400100_CIDRβ1	1805-2061	42.1053	CIDR
DC32	PfEMP1	PF3D7_0400400_CIDRα1.1	475-727	71.0526	CIDR
DC37	PfEMP1	PF3D7_0400400_CIDRγ8	2619-2896	36.8421	CIDR
DC39	PfEMP1	PF3D7_0412400_CIDRα3.1	510-822	68.4211	CIDR
DC4	PfEMP1	PF3D7_0100100_CIDRβ1	1364-1614	81.5789	CIDR
DC41	PfEMP1	PF3D7_0412400_CIDRβ1	1366-1634	47.3684	CIDR
DC43	PfEMP1	PF3D7_0412700_CIDRα3.2	537-818	63.1579	CIDR
DC45	PfEMP1	PF3D7_0412700_CIDRβ1	1443-1704	52.6316	CIDR
DC47	PfEMP1	PF3D7_0412900_CIDRα3.1	506-788	52.6316	CIDR
DC49	PfEMP1	PF3D7_0412900_CIDRγ2	1449-1722	36.8421	CIDR
DC51	PfEMP1	PF3D7_0413100_CIDRα3.1	510-802	60.5263	CIDR
DC53	PfEMP1	PF3D7_0413100_CIDRγ2	1463-1736	57.8947	CIDR
DC55	PfEMP1	PF3D7_0420700_CIDRα3.2	508-806	36.8421	CIDR
DC57	PfEMP1	PF3D7_0420700_CIDRγ6	1331-1586	63.1579	CIDR
DC59	PfEMP1	PF3D7_0420900_CIDRα3.2	508-806	47.3684	CIDR
DC61	PfEMP1	PF3D7_0420900_CIDRγ11	1351-1630	39.4737	CIDR
DC63	PfEMP1	PF3D7_0421100_CIDRα4	473-754	84.2105	CIDR
DC65	PfEMP1	PF3D7_0421100_CIDRγ11	1331-1610	73.6842	CIDR
DC67	PfEMP1	PF3D7_0421300_CIDRα3.4	491-783	50	CIDR
DC69	PfEMP1	PF3D7_0421300_CIDRβ1	1385-1629	52.6316	CIDR
DC71	PfEMP1	PF3D7_0425800_CIDRα1.6	479-728	81.5789	CIDR
DC76	PfEMP1	PF3D7_0425800_CIDRβ5	2745-2990	71.0526	CIDR
DC78	PfEMP1	PF3D7_0426000_CIDRα4	489-743	60.5263	CIDR
DC8	PfEMP1	PF3D7_0115700_CIDRα2.8	498-789	68.4211	CIDR
DC80	PfEMP1	PF3D7_0426000_CIDRβ1	1300-1557	44.7368	CIDR
DC82	PfEMP1	PF3D7_0500100_CIDRα2.4	498-754	36.8421	CIDR
DC84	PfEMP1	PF3D7_0500100_CIDRβ1	1386-1640	76.3158	CIDR
DC86	PfEMP1	PF3D7_0533100_CIDRα1.3	475-726	89.4737	CIDR
DC94	PfEMP1	PF3D7_0600200_CIDRα1.8	453-708	81.5789	CIDR
RS1	RIFIN	PF3D7_0100200	19-288	84.2105	RIFIN
RS10	RIFIN	PF3D7_0114700	23-292	36.8421	RIFIN
RS100	RIFIN	PF3D7_0732200	22-140	60.5263	RIFIN
RS101	RIFIN	PF3D7_0732200	164-323	92.1053	RIFIN
RS102	RIFIN	PF3D7_0732300	24-295	84.2105	RIFIN
RS103	RIFIN	PF3D7_0732400	27-152	65.7895	RIFIN
RS104	RIFIN	PF3D7_0732400	176-339	84.2105	RIFIN
RS105	RIFIN	PF3D7_0732500	26-329	71.0526	RIFIN
RS106	RIFIN	PF3D7_0732700	27-118	76.3158	RIFIN
RS107	RIFIN	PF3D7_0732700	142-316	47.3684	RIFIN
RS108	RIFIN	PF3D7_0732900	19-296	47.3684	RIFIN
RS109	RIFIN	PF3D7_0800400	19-287	71.0526	RIFIN
RS11	RIFIN	PF3D7_0115200	19-325	44.7368	RIFIN
RS110	RIFIN	PF3D7_0800500	23-332	50	RIFIN
RS111	RIFIN	PF3D7_0808800	28-327	68.4211	RIFIN
RS112	RIFIN	PF3D7_0808900	25-147	55.2632	RIFIN
RS113	RIFIN	PF3D7_0808900	171-290	39.4737	RIFIN
RS117	RIFIN	PF3D7_0832500	26-283	50	RIFIN
RS118	RIFIN	PF3D7_0832800	19-263	52.6316	RIFIN
RS12	RIFIN	PF3D7_0115300	23-293	73.6842	RIFIN
RS121	RIFIN	PF3D7_0833000	19-325	50	RIFIN
RS122	RIFIN	PF3D7_0833100	23-325	71.0526	RIFIN
RS123	RIFIN	PF3D7_0833200	23-313	44.7368	RIFIN
RS124	RIFIN	PF3D7_0833400	24-297	71.0526	RIFIN
RS125	RIFIN	PF3D7_0900200	19-333	63.1579	RIFIN
RS126	RIFIN	PF3D7_0900300	28-316	65.7895	RIFIN
RS127	RIFIN	PF3D7_0900400	19-300	47.3684	RIFIN
RS128	RIFIN	PF3D7_0900500	26-295	5.26316	RIFIN
RS129	RIFIN	PF3D7_0900600	19-324	78.9474	RIFIN
RS130	RIFIN	PF3D7_0900700	24-338	71.0526	RIFIN
RS133	RIFIN	PF3D7_0901000	26-117	50	RIFIN
RS134	RIFIN	PF3D7_0901000	141-266	76.3158	RIFIN
RS135	RIFIN	PF3D7_0901100	20-326	55.2632	RIFIN
RS136	RIFIN	PF3D7_0901300	19-335	57.8947	RIFIN
RS137	RIFIN	PF3D7_0901400	22-307	52.6316	RIFIN
RS138	RIFIN	PF3D7_0901500	25-322	76.3158	RIFIN
RS141	RIFIN	PF3D7_0937300	20-308	2.63158	RIFIN
RS142	RIFIN	PF3D7_0937400	27-316	100	RIFIN
RS143	RIFIN	PF3D7_0937500	19-326	50	RIFIN
RS144	RIFIN	PF3D7_0937700	19-324	57.8947	RIFIN
RS145	RIFIN	PF3D7_1000200	19-328	71.0526	RIFIN
RS146	RIFIN	PF3D7_1000300	25-302	60.5263	RIFIN
RS147	RIFIN	PF3D7_1000400	19-328	68.4211	RIFIN
RS148	RIFIN	PF3D7_1000500	24-326	39.4737	RIFIN
RS149	RIFIN	PF3D7_1000600	27-121	55.2632	RIFIN
RS15	RIFIN	PF3D7_0115600	19-336	50	RIFIN
RS150	RIFIN	PF3D7_1000600	145-296	68.4211	RIFIN
RS151	RIFIN	PF3D7_1040000	28-317	55.2632	RIFIN
RS152	RIFIN	PF3D7_1040100	26-266	60.5263	RIFIN
RS155	RIFIN	PF3D7_1040300	24-335	84.2105	RIFIN
RS156	RIFIN	PF3D7_1040400	26-305	63.1579	RIFIN
RS157	RIFIN	PF3D7_1040500	19-307	68.4211	RIFIN
RS158	RIFIN	PF3D7_1040600	28-283	97.3684	RIFIN
RS159	RIFIN	PF3D7_1040700	19-329	73.6842	RIFIN
RS16	RIFIN	PF3D7_0200200	24-291	47.3684	RIFIN
RS160	RIFIN	PF3D7_1040800	21-265	47.3684	RIFIN
RS161	RIFIN	PF3D7_1040900	28-268	86.8421	RIFIN
RS162	RIFIN	PF3D7_1041000	21-327	63.1579	RIFIN
RS163	RIFIN	PF3D7_1041100	24-291	89.4737	RIFIN
RS164	RIFIN	PF3D7_1041200	19-328	52.6316	RIFIN
RS165	RIFIN	PF3D7_1100300	19-297	55.2632	RIFIN
RS166	RIFIN	PF3D7_1100400	23-280	57.8947	RIFIN
RS167	RIFIN	PF3D7_1100500	26-146	42.1053	RIFIN
RS168	RIFIN	PF3D7_1100500	170-284	78.9474	RIFIN
RS169	RIFIN	PF3D7_1101100	19-306	2.63158	RIFIN
RS170	RIFIN	PF3D7_1101200	26-313	78.9474	RIFIN
RS171	RIFIN	PF3D7_1101300	23-150	63.1579	RIFIN
RS172	RIFIN	PF3D7_1101300	174-287	71.0526	RIFIN
RS173	RIFIN	PF3D7_1149800	24-271	52.6316	RIFIN
RS175	RIFIN	PF3D7_1150000	27-326	39.4737	RIFIN
RS176	RIFIN	PF3D7_1150200	23-295	50	RIFIN
RS177	RIFIN	PF3D7_1150300	19-298	47.3684	RIFIN
RS178	RIFIN	PF3D7_1200200	19-335	60.5263	RIFIN
RS179	RIFIN	PF3D7_1200300	23-302	31.5789	RIFIN
RS180	RIFIN	PF3D7_1200500	19-326	76.3158	RIFIN
RS181	RIFIN	PF3D7_1253700	28-322	47.3684	RIFIN
RS182	RIFIN	PF3D7_1254000	24-303	10.5263	RIFIN
RS185	RIFIN	PF3D7_1254200	19-308	81.5789	RIFIN
RS188	RIFIN	PF3D7_1254400	24-336	60.5263	RIFIN
RS189	RIFIN	PF3D7_1254500	21-269	76.3158	RIFIN
RS192	RIFIN	PF3D7_1254700	19-283	23.6842	RIFIN
RS193	RIFIN	PF3D7_1254800	19-274	47.3684	RIFIN
RS194	RIFIN	PF3D7_1255000	29-119	47.3684	RIFIN
RS195	RIFIN	PF3D7_1255000	143-302	7.89474	RIFIN
RS196	RIFIN	PF3D7_1255100	19-307	76.3158	RIFIN
RS197	RIFIN	PF3D7_1300200	19-305	68.4211	RIFIN
RS198	RIFIN	PF3D7_1300400	19-300	78.9474	RIFIN
RS199	RIFIN	PF3D7_1300500	19-288	47.3684	RIFIN
RS2	RIFIN	PF3D7_0100400	19-329	81.5789	RIFIN
RS20	RIFIN	PF3D7_0200500	19-327	73.6842	RIFIN
RS200	RIFIN	PF3D7_1300600	29-302	55.2632	RIFIN
RS201	RIFIN	PF3D7_1300700	23-326	63.1579	RIFIN
RS204	RIFIN	PF3D7_1372600	17-242	71.0526	RIFIN
RS205	RIFIN	PF3D7_1372700	23-305	50	RIFIN
RS208	RIFIN	PF3D7_1373000	19-293	7.89474	RIFIN
RS209	RIFIN	PF3D7_1373100	19-298	86.8421	RIFIN
RS21	RIFIN	PF3D7_0200600	26-332	57.8947	RIFIN
RS210	RIFIN	PF3D7_1373300	28-311	92.1053	RIFIN
RS211	RIFIN	PF3D7_1373400	19-334	76.3158	RIFIN
RS212	RIFIN	PF3D7_1400200	23-321	84.2105	RIFIN
RS213	RIFIN	PF3D7_1400300	27-117	65.7895	RIFIN
RS214	RIFIN	PF3D7_1400300	141-299	73.6842	RIFIN
RS215	RIFIN	PF3D7_1400400	23-144	68.4211	RIFIN
RS216	RIFIN	PF3D7_1400400	168-294	60.5263	RIFIN
RS217	RIFIN	PF3D7_1400500	27-296	76.3158	RIFIN
RS218	RIFIN	PF3D7_1400600	19-325	84.2105	RIFIN
RS22	RIFIN	PF3D7_0200700	19-287	63.1579	RIFIN
RS221	RIFIN	PF3D7_1400800	27-118	50	RIFIN
RS222	RIFIN	PF3D7_1400800	142-273	78.9474	RIFIN
RS224	RIFIN	PF3D7_1479400	26-121	31.5789	RIFIN
RS225	RIFIN	PF3D7_1479400	145-316	34.2105	RIFIN
RS228	RIFIN	PF3D7_1479600	27-121	50	RIFIN
RS229	RIFIN	PF3D7_1479600	145-307	60.5263	RIFIN
RS23	RIFIN	PF3D7_0201000	21-113	36.8421	RIFIN
RS230	RIFIN	PF3D7_1479700	19-305	97.3684	RIFIN
RS231	RIFIN	PF3D7_1479800	26-301	73.6842	RIFIN
RS234	RIFIN	PF3D7_1480000	19-297	89.4737	RIFIN
RS24	RIFIN	PF3D7_0201000	137-269	52.6316	RIFIN
RS25	RIFIN	PF3D7_0201200	23-313	76.3158	RIFIN
RS29	RIFIN	PF3D7_0222500	28-273	84.2105	RIFIN
RS3	RIFIN	PF3D7_0100600	26-316	60.5263	RIFIN
RS30	RIFIN	PF3D7_0222600	19-325	86.8421	RIFIN
RS31	RIFIN	PF3D7_0222700	26-305	76.3158	RIFIN
RS34	RIFIN	PF3D7_0223100	28-141	52.6316	RIFIN
RS35	RIFIN	PF3D7_0223100	165-287	60.5263	RIFIN
RS36	RIFIN	PF3D7_0223200	28-302	57.8947	RIFIN
RS37	RIFIN	PF3D7_0223400	19-284	39.4737	RIFIN
RS38	RIFIN	PF3D7_0300200	19-283	52.6316	RIFIN
RS4	RIFIN	PF3D7_0100800	19-301	50	RIFIN
RS41	RIFIN	PF3D7_0300500	26-316	60.5263	RIFIN
RS42	RIFIN	PF3D7_0300700	25-325	81.5789	RIFIN
RS43	RIFIN	PF3D7_0300800	23-280	89.4737	RIFIN
RS44	RIFIN	PF3D7_0324400	25-158	73.6842	RIFIN
RS45	RIFIN	PF3D7_0324400	182-306	92.1053	RIFIN
RS46	RIFIN	PF3D7_0324500	27-122	55.2632	RIFIN
RS47	RIFIN	PF3D7_0324500	146-274	89.4737	RIFIN
RS5	RIFIN	PF3D7_0100900	23-307	73.6842	RIFIN
RS50	RIFIN	PF3D7_0324800	24-328	52.6316	RIFIN
RS51	RIFIN	PF3D7_0400300	19-327	44.7368	RIFIN
RS52	RIFIN	PF3D7_0400500	19-339	44.7368	RIFIN
RS53	RIFIN	PF3D7_0400700	19-337	57.8947	RIFIN
RS56	RIFIN	PF3D7_0400900	19-286	71.0526	RIFIN
RS57	RIFIN	PF3D7_0401000	22-266	84.2105	RIFIN
RS58	RIFIN	PF3D7_0401200	19-332	76.3158	RIFIN
RS59	RIFIN	PF3D7_0401300	19-332	63.1579	RIFIN
RS6	RIFIN	PF3D7_0101000	28-315	65.7895	RIFIN
RS60	RIFIN	PF3D7_0401400	24-286	42.1053	RIFIN
RS61	RIFIN	PF3D7_0401600	25-253	26.3158	RIFIN
RS63	RIFIN	PF3D7_0413200	24-333	47.3684	RIFIN
RS64	RIFIN	PF3D7_0413300	26-303	55.2632	RIFIN
RS65	RIFIN	PF3D7_0421200	27-303	39.4737	RIFIN
RS67	RIFIN	PF3D7_0425700	19-281	52.6316	RIFIN
RS68	RIFIN	PF3D7_0425900	19-281	50	RIFIN
RS69	RIFIN	PF3D7_0500400	19-331	55.2632	RIFIN
RS7	RIFIN	PF3D7_0101600	19-326	84.2105	RIFIN
RS70	RIFIN	PF3D7_0500500	24-266	86.8421	RIFIN
RS71	RIFIN	PF3D7_0532900	25-125	71.0526	RIFIN
RS72	RIFIN	PF3D7_0532900	149-275	73.6842	RIFIN
RS73	RIFIN	PF3D7_0600300	19-328	86.8421	RIFIN
RS74	RIFIN	PF3D7_0600500	23-328	76.3158	RIFIN
RS75	RIFIN	PF3D7_0600700	19-306	73.6842	RIFIN
RS78	RIFIN	PF3D7_0617700	26-288	57.8947	RIFIN
RS79	RIFIN	PF3D7_0631800	23-300	52.6316	RIFIN
RS82	RIFIN	PF3D7_0632000	22-327	55.2632	RIFIN
RS83	RIFIN	PF3D7_0632100	19-280	42.1053	RIFIN
RS84	RIFIN	PF3D7_0632200	19-144	26.3158	RIFIN
RS85	RIFIN	PF3D7_0632200	168-334	36.8421	RIFIN
RS86	RIFIN	PF3D7_0632300	26-316	76.3158	RIFIN
RS87	RIFIN	PF3D7_0632400	19-334	73.6842	RIFIN
RS88	RIFIN	PF3D7_0632700	19-333	71.0526	RIFIN
RS89	RIFIN	PF3D7_0700200	23-280	63.1579	RIFIN
RS9	RIFIN	PF3D7_0101900	26-300	73.6842	RIFIN
RS90	RIFIN	PF3D7_0700300	22-135	73.6842	RIFIN
RS91	RIFIN	PF3D7_0700300	159-273	52.6316	RIFIN
RS94	RIFIN	PF3D7_0700500	25-314	42.1053	RIFIN
RS95	RIFIN	PF3D7_0701100	19-286	68.4211	RIFIN
RS96	RIFIN	PF3D7_0701800	23-288	44.7368	RIFIN
RS97	RIFIN	PF3D7_0713000	24-303	81.5789	RIFIN
RS114	STEVOR	PF3D7_0832000	21-261	47.3684	STEVOR
RS115	STEVOR	PF3D7_0832400	23-179	0	STEVOR
RS116	STEVOR	PF3D7_0832400	200-264	55.2632	STEVOR
RS119	STEVOR	PF3D7_0832900	21-173	34.2105	STEVOR
RS120	STEVOR	PF3D7_0832900	197-264	47.3684	STEVOR
RS13	STEVOR	PF3D7_0115400	23-178	36.8421	STEVOR
RS131	STEVOR	PF3D7_0900900	21-181	26.3158	STEVOR
RS132	STEVOR	PF3D7_0900900	205-260	65.7895	STEVOR
RS139	STEVOR	PF3D7_0901600	28-178	36.8421	STEVOR
RS14	STEVOR	PF3D7_0115400	202-261	5.26316	STEVOR
RS140	STEVOR	PF3D7_0901600	202-263	31.5789	STEVOR
RS153	STEVOR	PF3D7_1040200	28-182	34.2105	STEVOR
RS154	STEVOR	PF3D7_1040200	206-265	0	STEVOR
RS174	STEVOR	PF3D7_1149900	23-176	39.4737	STEVOR
RS184	STEVOR	PF3D7_1254100	198-255	73.6842	STEVOR
RS186	STEVOR	PF3D7_1254300	23-177	42.1053	STEVOR
RS187	STEVOR	PF3D7_1254300	198-262	76.3158	STEVOR
RS190	STEVOR	PF3D7_1254600	24-177	36.8421	STEVOR
RS191	STEVOR	PF3D7_1254600	198-262	50	STEVOR
RS202	STEVOR	PF3D7_1300900	21-178	50	STEVOR
RS203	STEVOR	PF3D7_1300900	202-268	57.8947	STEVOR
RS206	STEVOR	PF3D7_1372800	21-178	50	STEVOR
RS207	STEVOR	PF3D7_1372800	199-260	47.3684	STEVOR
RS219	STEVOR	PF3D7_1400700	23-178	50	STEVOR
RS220	STEVOR	PF3D7_1400700	202-253	50	STEVOR
RS226	STEVOR	PF3D7_1479500	23-174	42.1053	STEVOR
RS227	STEVOR	PF3D7_1479500	198-259	92.1053	STEVOR
RS232	STEVOR	PF3D7_1479900	24-178	36.8421	STEVOR
RS233	STEVOR	PF3D7_1479900	202-264	34.2105	STEVOR
RS235	STEVOR	PF3D7_0200400	24-181	71.0526	STEVOR
RS236	STEVOR	PF3D7_0200400	202-264	57.8947	STEVOR
RS26	STEVOR	PF3D7_0201300	23-178	44.7368	STEVOR
RS27	STEVOR	PF3D7_0201300	202-265	50	STEVOR
RS28	STEVOR	PF3D7_0221400	27-229	65.7895	STEVOR
RS32	STEVOR	PF3D7_0222800	23-174	36.8421	STEVOR
RS33	STEVOR	PF3D7_0222800	198-264	34.2105	STEVOR
RS39	STEVOR	PF3D7_0300400	23-177	55.2632	STEVOR
RS40	STEVOR	PF3D7_0300400	198-256	50	STEVOR
RS48	STEVOR	PF3D7_0324600	21-174	47.3684	STEVOR
RS49	STEVOR	PF3D7_0324600	198-261	65.7895	STEVOR
RS54	STEVOR	PF3D7_0400800	23-174	50	STEVOR
RS55	STEVOR	PF3D7_0400800	198-249	60.5263	STEVOR
RS62	STEVOR	PF3D7_0402600	21-261	31.5789	STEVOR
RS66	STEVOR	PF3D7_0425500	21-263	21.0526	STEVOR
RS76	STEVOR	PF3D7_0617600	23-177	36.8421	STEVOR
RS77	STEVOR	PF3D7_0617600	201-262	52.6316	STEVOR
RS8	STEVOR	PF3D7_0101800	21-174	84.2105	STEVOR
RS80	STEVOR	PF3D7_0631900	23-174	36.8421	STEVOR
RS81	STEVOR	PF3D7_0631900	198-263	39.4737	STEVOR
RS92	STEVOR	PF3D7_0700400	24-174	36.8421	STEVOR
RS93	STEVOR	PF3D7_0700400	198-260	44.7368	STEVOR
RS98	STEVOR	PF3D7_0732000	24-174	47.3684	STEVOR
RS99	STEVOR	PF3D7_0732000	198-256	71.0526	STEVOR
RS237	SURFIN 13.1, pseudogene	PF3D7_1301800	2-657	42.1053	SURFIN
RS238	SURFIN 13.1, pseudogene	PF3D7_1301800	658-1319	42.1053	SURFIN
RS239	SURFIN 13.1, pseudogene	PF3D7_1301800	1644-2164	31.5789	SURFIN
RS240	SURFIN 13.1, pseudogene	PF3D7_1301800	1343-1626	89.4737	SURFIN
RS241	SURFIN 14.1	PF3D7_1477600	371-904	92.1053	SURFIN
RS242	SURFIN 14.1	PF3D7_1477600	905-1442	73.6842	SURFIN
RS243	SURFIN 14.1	PF3D7_1477600	1443-1953	100	SURFIN
RS244	SURFIN 8.1	PF3D7_0831100	1369-1921	65.7895	SURFIN
RS245	SURFIN 8.1	PF3D7_0831100	867-1368	73.6842	SURFIN
RS246	SURFIN 8.1	PF3D7_0831100	363-866	42.1053	SURFIN
RS247	SURFIN 8.2	PF3D7_0830800	1304-2049	42.1053	SURFIN
RS248	SURFIN 8.2	PF3D7_0830800	569-1303	39.4737	SURFIN
RS250	SURFIN 8.3	PF3D7_0800700	853-1388	68.4211	SURFIN
RS251	SURFIN 8.3	PF3D7_0800700	351-852	86.8421	SURFIN
RS252	SURFIN 4.2	PF3D7_0424400	1797-2380	89.4737	SURFIN
RS253	SURFIN 4.2	PF3D7_0424400	1195-1796	84.2105	SURFIN
RS254	SURFIN 4.2	PF3D7_0424400	595-1194	47.3684	SURFIN
RS255	SURFIN 4.2	PF3D7_0424400	2-594	47.3684	SURFIN
RS256	SURFIN 4.1, pseudogene	PF3D7_0402200	1605-2219	81.5789	SURFIN
RS257	SURFIN 4.1, pseudogene	PF3D7_0402200	1071-1604	28.9474	SURFIN
RS258	SURFIN 4.1, pseudogene	PF3D7_0402200	537-1070	94.7368	SURFIN
RS259	SURFIN 4.1, pseudogene	PF3D7_0402200	2-536	50	SURFIN
RS260	SURFIN 1.3	PF3D7_0115000	1354-1925	97.3684	SURFIN
RS261	SURFIN 1.3	PF3D7_0115000	853-1353	71.0526	SURFIN
RS262	SURFIN 1.3	PF3D7_0115000	351-852	92.1053	SURFIN
RS263	SURFIN 1.2, pseudogene	PF3D7_0113600	1271-1893	76.3158	SURFIN
RS264	SURFIN 1.2, pseudogene	PF3D7_0113600	636-1270	100	SURFIN
RS265	SURFIN 1.2, pseudogene	PF3D7_0113600	2-635	60.5263	SURFIN
RS266	SURFIN 1.1	PF3D7_0113100	936-1555	92.1053	SURFIN
RS267	SURFIN 1.1	PF3D7_0113100	331-935	57.8947	SURFIN
RS268	SURFIN 4.2	PF3D7_0424400	765-1194	68.4211	SURFIN
RS269	SURFIN 1.2, pseudogene	PF3D7_0113600	878-1270	52.6316	SURFIN
