# Supplementary material for: High-Throughput Antibody Profiling Identifies Targets of Protective Immunity against P. falciparum Malaria in Thailand
Source: Biomolecules. 2023 Aug 18;13(8):1267. doi: 10.3390/biom13081267 (PMC10452476; doi:10.3390/biom13081267)
Supplement: Supplementary file 1 [file biomolecules-13-01267-s001.zip › Table S2 (all antigens univariate).xlsx]

## Sheet: Sheet1
Table S2: Univariate analysis of 691 P. falciparum proteins assessed in this study
Gene ID and Domain	Protein ID	OR	Lower CI	Upper CI	p value
PF3D7_1219300_CIDRα3.4	DC239	0.00288263	0.000123653	0.0672005	0.000272011
PF3D7_1150400_DBLβ3	DC217	0.0378652	0.0061903	0.231616	0.000395639
PF3D7_1240300_CIDRα4	DC243	0.00235061	7.79e-05	0.0709059	0.000496605
PF3D7_0412900_CIDRα3.1	DC47	0.00954172	0.000692251	0.13152	0.000509778
PF3D7_0223500_CIDRα3.4	DC15	0.0087242	0.000563243	0.135131	0.000694702
PF3D7_0421300_DBLα0.24	DC66	0.00291071	9.85e-05	0.0859779	0.000723691
PF3D7_0937800_DBLδ1	DC195	0.00436711	0.000178979	0.106558	0.000856835
PF3D7_1035500	WE18	0.0114599	0.000822541	0.159663	0.000883835
PF3D7_0425800_CIDRβ5	DC76	0.0169554	0.00151009	0.190377	0.000952049
PF3D7_1366400	WE76.2	0.00689988	0.00035859	0.132765	0.000972586
PF3D7_1200100_CIDRβ1	DC224	0.0268525	0.00312241	0.230928	0.000984085
PF3D7_0421100_CIDRγ11	DC65	0.0212355	0.00210631	0.214094	0.00108547
PF3D7_0937800_CIDRα3.1	DC194	0.00677018	0.000337921	0.135639	0.00108962
PF3D7_1240600_DBLδ1	DC253	0.0155772	0.00128045	0.189503	0.00109541
PF3D7_0421100_CIDRα4	DC63	0.00196868	4.64e-05	0.0835053	0.00111983
PF3D7_0809100_CIDRβ1	DC182	0.00245404	6.58e-05	0.0915245	0.00113369
PF3D7_0413100_CIDRα3.1	DC51	0.0149575	0.00117627	0.190201	0.00119846
PF3D7_0600200_DBLβ13	DC95	0.0320864	0.00398244	0.258519	0.00123466
PF3D7_1255200_CIDRα2.3	DC256	0.0238974	0.00246905	0.231298	0.00126349
PF3D7_0712800_CIDRα2.4	DC143	0.00288911	8.25e-05	0.101131	0.00126797
PF3D7_1373500_DBLδ1	DC272	0.0200068	0.00183809	0.217766	0.00132057
PF3D7_0800200_DBLγ14	DC162	0.0198542	0.00181491	0.217196	0.00132282
PF3D7_0533100_CIDRα1.3	DC86	0.0028	7.69e-05	0.10194	0.00135073
PF3D7_0809100_DBLδ1	DC181	0.00190715	4.14e-05	0.0879037	0.00135476
PF3D7_1200400_DBLz5	DC229	0.067293	0.0129112	0.35073	0.00135596
PF3D7_0420700_CIDRγ6	DC57	0.0206037	0.00188441	0.225277	0.00146603
PF3D7_0324900_CIDRα2.1	DC23	0.0314254	0.00370148	0.266801	0.00152045
PF3D7_1240400_CIDRα3.4	DC248	0.0198757	0.00176114	0.224311	0.00153052
PF3D7_1100200_CIDRβ4	DC213	0.0103156	0.000608967	0.174742	0.00153324
PF3D7_1150400_DBLδ3	DC219	0.0291447	0.00322857	0.263093	0.00163575
PF3D7_0412900_CIDRγ2	DC49	0.0309727	0.0035276	0.271945	0.00171975
PF3D7_0632500_DBLe2	DC113	0.024154	0.00235274	0.247973	0.00172694
PF3D7_1035400	WE14	0.003941	0.000121794	0.127523	0.00180254
PF3D7_0412700_DBLδ1	DC44	0.0350631	0.00425176	0.289156	0.00185396
PF3D7_1017100	WE10	0.0118374	0.000718759	0.194954	0.00191
PF3D7_1100200_DBLγ12	DC211	0.01462	0.00101136	0.211344	0.00193197
PF3D7_0606800	WE7	0.0139243	0.000932366	0.20795	0.00194508
PF3D7_0426000_CIDRβ1	DC80	0.0189605	0.00154157	0.233204	0.00195467
PF3D7_0223500_CIDRβ1	DC17	0.0144609	0.000987205	0.211827	0.00198008
PF3D7_0200100_DBLγ11	DC13	0.0557126	0.00893615	0.347342	0.00198477
PF3D7_0207600	WE65	0.00897032	0.00044716	0.17995	0.00206321
PF3D7_1100100_CIDRα3.2	DC206	0.000404092	2.79e-06	0.0585415	0.00208462
PF3D7_0300100_DBLδ1	DC20	0.0340501	0.00392576	0.295333	0.00216521
PF3D7_0324900_CIDRβ7	DC25	0.0348527	0.00406383	0.298908	0.00220297
PF3D7_0712600_CIDRβ1	DC141	0.00791866	0.000354239	0.177013	0.00227091
PF3D7_0632500_DBLβ5	DC108	0.00373545	0.000102921	0.135576	0.002285
PF3D7_1373500_CIDRα3.4	DC271	0.0242969	0.00221862	0.266085	0.00233325
PF3D7_0809100_CIDRα2.2	DC180	0.0068603	0.000277145	0.169816	0.0023427
PF3D7_0712900_CIDRα3.1	DC147	0.0244984	0.00224231	0.267657	0.00236255
PF3D7_1250200	WE69	0.0137869	0.000870087	0.218459	0.00237273
PF3D7_1431400	WE68	0.027601	0.00271976	0.280104	0.00239445
PF3D7_0425800_CIDRα1.6	DC71	0.0236816	0.00211196	0.265543	0.00240353
PF3D7_1255200_DBLδ1	DC257	0.0050478	0.000165687	0.153786	0.0024132
PF3D7_1300300_CIDRβ3	DC268	0.0258251	0.00242954	0.27451	0.0024294
PF3D7_1228600	WE45	0.0104264	0.000545069	0.199442	0.00243948
PF3D7_0700100_DBLδ1	DC120	0.00166069	2.65e-05	0.104244	0.00244096
PF3D7_0400400_DBLβ12	DC33	0.0422202	0.00540132	0.33002	0.00255536
PF3D7_0600200_DBLγ4	DC96	0.00881556	0.000406962	0.190962	0.00256862
PF3D7_1200600_DBLe10	DC237	0.0170653	0.00120883	0.240913	0.00258033
PF3D7_0712900_CIDRβ1	DC149	0.0212284	0.00172867	0.260691	0.00260675
PF3D7_1219300_DBLα0.16	DC238	0.0255621	0.00234532	0.278606	0.00262447
PF3D7_0700100_CIDRβ1	DC121	0.0230134	0.00196204	0.269933	0.00267756
PF3D7_1200600_DBLpam2	DC232	0.0436252	0.00558469	0.340781	0.0028224
PF3D7_0800300_DBLδ1	DC169	0.00641151	0.00023048	0.178356	0.00292007
PF3D7_0420900_CIDRα3.2	DC59	0.00819706	0.000344279	0.195167	0.00297595
PF3D7_0400400_DBLδ1	DC36	0.0105519	0.000521751	0.213402	0.00300898
PF3D7_0412900_DBLα0.1	DC46	0.0297052	0.00287298	0.307138	0.00317296
PF3D7_0413100_CIDRγ2	DC53	0.0423363	0.00516572	0.346973	0.00321651
PF3D7_0412700_CIDRβ1	DC45	0.0274134	0.00249367	0.301361	0.00327515
PF3D7_0808700_CIDRβ1	DC178	0.0207483	0.00155717	0.276459	0.00335587
PF3D7_0733000_CIDRβ1	DC153	0.026251	0.00230093	0.299495	0.00338187
PF3D7_1240300_CIDRβ1	DC246	0.0361236	0.00391534	0.333283	0.00339849
PF3D7_0800300_CIDRα1.6	DC166	0.0301577	0.00289112	0.31458	0.00342551
PF3D7_0500100_DBLδ1	DC83	0.0440895	0.00543153	0.357889	0.0034804
PF3D7_1240300_DBLδ1	DC245	0.0142635	0.000824065	0.246883	0.00348237
PF3D7_0426000_CIDRα4	DC78	0.0175854	0.00116818	0.264723	0.00349276
PF3D7_1150400_DBLβ6	DC218	0.00507393	0.000146326	0.175941	0.00349552
PF3D7_0632500_DBLδ4	DC110	0.0125616	0.000660334	0.238959	0.00358573
PF3D7_0612800	WE23	0.0452944	0.00563642	0.363988	0.00360816
PF3D7_0632500_DBLγ1	DC109	0.0310583	0.00299266	0.322329	0.00363233
PF3D7_0424100	WE33	0.0247679	0.00204336	0.300217	0.00366956
PF3D7_0115700_CIDRα2.8	DC8	0.034684	0.00358901	0.335184	0.00367882
PF3D7_0400400_DBLγ11	DC35	0.0120744	0.000612213	0.238139	0.00369369
PF3D7_0533100_DBLγ15	DC88	0.0195665	0.00137246	0.27895	0.00371107
PF3D7_0421300_CIDRβ1	DC69	0.0261283	0.00221908	0.307643	0.00376794
PF3D7_1300300_DBLδ5	DC267	0.00909624	0.000376182	0.219951	0.00383105
PF3D7_0420900_DBLδ1	DC60	0.00640706	0.000207999	0.197359	0.00387801
PF3D7_0421300_CIDRα3.4	DC67	0.00934718	0.000391103	0.223393	0.00390682
PF3D7_0712800_CIDRγ5	DC145	0.0321048	0.00310268	0.332202	0.00392232
PF3D7_0800300_CIDRβ1	DC170	0.0240562	0.00190699	0.303463	0.00395086
PF3D7_0508000	WE15	0.0222243	0.00166746	0.296212	0.00396706
PF3D7_0600200_CIDRα1.8	DC94	0.029768	0.00271983	0.325804	0.00399456
PF3D7_0413100_DBLδ1	DC52	0.0378256	0.00405917	0.35248	0.00403155
PF3D7_0101800	RS8	0.0289891	0.0025692	0.327092	0.00418522
PF3D7_0500100_CIDRα2.4	DC82	0.0182309	0.00117523	0.282807	0.00419772
PF3D7_1476200	PF14.1	0.0032709	6.5e-05	0.164503	0.00419773
PF3D7_0711700_CIDRβ6	DC125	0.0510291	0.00664409	0.391922	0.00422911
PF3D7_0800200_CIDRδ2	DC160	0.0137287	0.000723126	0.260641	0.00429969
PF3D7_0712400_DBLγ9	DC137	0.000619873	3.89e-06	0.0987413	0.00430481
PF3D7_0600200_DBLe12	DC98	0.02412	0.00186394	0.31212	0.00435345
PF3D7_0412700_CIDRα3.2	DC43	0.0375325	0.00388129	0.362944	0.00457585
PF3D7_0404900	WE22	0.0126422	0.000615842	0.259521	0.00458351
PF3D7_0425800_DBLδ1	DC75	0.044917	0.00524638	0.384557	0.00462126
PF3D7_1219300_CIDRγ12	DC241	0.00588635	0.000167917	0.206346	0.00465988
PF3D7_0800200_DBLβ6	DC161	0.0100173	0.00041154	0.24383	0.00470546
PF3D7_0412400_CIDRα3.1	DC39	0.0410339	0.00445013	0.378367	0.00483991
PF3D7_1035300	WE50.1	0.0669322	0.0101763	0.440231	0.00489709
PF3D7_1366400	WE76.1	0.0185644	0.0011467	0.300548	0.00501247
PF3D7_0722200	WE56.3	0.0470791	0.00556503	0.398281	0.00503151
PF3D7_0712400_DBLα0.18	DC134	0.00550583	0.000143631	0.211056	0.0051708
PF3D7_1133400	WE41	0.0154588	0.000828773	0.288349	0.00522177
PF3D7_0400400_CIDRα1.1	DC32	0.0585427	0.00797691	0.429647	0.00525913
PF3D7_1035700	WE49	0.0299918	0.00254005	0.354131	0.00536658
PF3D7_0425800_DBLγ13	DC74	0.0370985	0.00362645	0.379516	0.00549232
PF3D7_1035900	WE35	0.101832	0.0202838	0.511233	0.00551998
PF3D7_1100200_CIDRγ3	DC210	0.017437	0.000987467	0.307909	0.00570774
PF3D7_0831600	WE81.1	0.0423792	0.00445206	0.403409	0.00596601
PF3D7_0937800_CIDRγ5	DC196	0.0439457	0.00472889	0.408389	0.00600758
PF3D7_0421300_DBLδ1	DC68	0.0654047	0.00934627	0.457698	0.00600838
PF3D7_1240600_CIDRβ1	DC254	0.0354935	0.00324224	0.388555	0.00625241
PF3D7_0800100_DBLδ1	DC157	0.0221271	0.00144047	0.339896	0.00625267
PF3D7_0507300	WE59	0.0707465	0.0105735	0.473359	0.00631012
PF3D7_1300100_CIDRα2.4	DC260	0.0155505	0.000783344	0.3087	0.00631559
PF3D7_1335000	WE21	0.0167281	0.000885252	0.316102	0.00637079
PF3D7_0811600	WE74.1	0.0342908	0.00303101	0.387944	0.00642984
PF3D7_1200600_DBLpam1	DC231	0.0489044	0.00555385	0.430627	0.00654598
PF3D7_1035600	WE51	0.0606473	0.00802772	0.458175	0.0065975
PF3D7_0733000_DBLe4	DC154	0.0215842	0.00133661	0.34855	0.00687989
PF3D7_0900100_CIDRγ12	DC190	0.0209741	0.00126084	0.348902	0.00705878
PF3D7_0712600_CIDRα3.1	DC139	0.0593872	0.00756647	0.466114	0.00722817
PF3D7_0831600	WE81.2	0.0395124	0.00373444	0.418063	0.00726152
PF3D7_0400100_CIDRα2.10	DC27	0.0577031	0.00717769	0.463888	0.00731194
PF3D7_1100100_DBLδ1	DC207	0.0119412	0.000464967	0.306672	0.00750088
PF3D7_0712000_CIDRα3.1	DC127	0.0511554	0.00578506	0.45235	0.0075092
PF3D7_0400100_DBLγ5	DC28	0.0633821	0.00837659	0.479586	0.00754708
PF3D7_1434400	WE9	0.0180939	0.000944426	0.346653	0.00773928
PF3D7_0833500_CIDRβ1	DC186	0.0261578	0.00178706	0.382882	0.00778686
PF3D7_0323400	WE70	0.0394334	0.00363517	0.427765	0.00785676
PF3D7_0620400	MSP10_1-1	0.0981215	0.0176928	0.544166	0.00790217
PF3D7_0405900	WE42	0.0607062	0.00767981	0.479861	0.00790507
PF3D7_1200100_CIDRα2.2	DC222	0.0302821	0.00227497	0.403084	0.00809761
PF3D7_0712300_DBLδ1	DC132	0.0139831	0.000591849	0.330364	0.008134
PF3D7_0808700_DBLδ1	DC177	0.0100589	0.000329268	0.307291	0.00837995
PF3D7_0420900_CIDRγ11	DC61	0.0562463	0.0066131	0.478392	0.00841149
PF3D7_0421100_DBLδ1	DC64	0.0191312	0.00100225	0.365181	0.00855086
PF3D7_1334800	WE6	0.066208	0.00874849	0.501058	0.00855835
PF3D7_0420700_DBLδ1	DC56	0.0320641	0.00245749	0.418354	0.00866608
PF3D7_1300100_CIDRβ1	DC262	0.050559	0.0054414	0.46977	0.00868263
PF3D7_0909600	WE38	0.0511243	0.00552828	0.472786	0.00879104
PF3D7_0412400_CIDRβ1	DC41	0.0325449	0.00250621	0.422618	0.00883347
PF3D7_0623300	WE53	0.0192564	0.000999215	0.371101	0.00887863
PF3D7_1310700	EH4	0.0375911	0.00321935	0.438938	0.00887885
PF3D7_0733000_CIDRα3.4	DC151	0.0428122	0.00403843	0.45386	0.00890172
PF3D7_1000100_DBLδ1	DC199	0.0432484	0.00410566	0.455572	0.00893722
PF3D7_0412900_DBLδ1	DC48	0.0364133	0.0030227	0.438657	0.00908186
PF3D7_0400400_CIDRγ8	DC37	0.0446007	0.00430928	0.461614	0.00909854
PF3D7_1420700	WE67	0.0558954	0.00638408	0.489389	0.00917297
PF3D7_1100200_DBLδ5	DC212	0.024572	0.00150741	0.400541	0.00925539
PF3D7_0419700	WE12	0.053623	0.00591115	0.48644	0.00930799
PF3D7_1100100_CIDRβ1	DC208	0.0546538	0.00610321	0.489422	0.0093538
PF3D7_1100200_DBLβ9	DC214	0.0535943	0.00589379	0.487351	0.00937219
PF3D7_0808700_CIDRα3.1	DC176	0.07602	0.010856	0.532334	0.00946103
PF3D7_1036000	WE24	0.108978	0.0204072	0.581962	0.00950424
PF3D7_0632800_CIDRα4	DC115	0.0217607	0.00120425	0.393213	0.00953904
PF3D7_0905400	WE58.1	0.0168439	0.000766775	0.370014	0.00957735
PF3D7_0620400	MSP10_1-3	0.0144687	0.00058254	0.359365	0.00975393
PF3D7_1116100	WE98.2	0.0818608	0.0122169	0.548516	0.00991475
PF3D7_0425800_DBLβ3	DC72	0.0307099	0.0021687	0.434867	0.0100012
PF3D7_0620400	MSP10_2-1	0.0735993	0.0100104	0.541122	0.0103673
PF3D7_0220000	WE87.1	0.0312375	0.00218618	0.446339	0.0106336
PF3D7_0833500_CIDRα3.1	DC184	0.0480511	0.0046629	0.495165	0.0107542
PF3D7_1150400_CIDRγ2	DC220	0.0458885	0.00426587	0.493629	0.0110071
PF3D7_0412700_DBLα0.1	DC42	0.0178604	0.000797661	0.399913	0.0111534
PF3D7_0711700_CIDRα3.2	DC123	0.0451146	0.00410889	0.495348	0.011256
PF3D7_0712400_CIDRα6	DC135	0.0416234	0.00355657	0.48713	0.0113068
PF3D7_0617400_DBLα0.21	DC101	0.070127	0.00894463	0.549804	0.011427
PF3D7_0400400_DBLγ6	DC34	0.0482644	0.00460028	0.506372	0.0114907
PF3D7_1240300_DBLα0.7	DC242	0.0346763	0.00252116	0.47694	0.0119513
PF3D7_1200600_DBLepam5	DC236	0.0146147	0.00054157	0.394388	0.0119574
PF3D7_0808200	WE36	0.0970359	0.0157342	0.598439	0.0119657
PF3D7_0620400	WE31	0.0387966	0.00307749	0.489091	0.0119658
PF3D7_0800300_DBLγ4	DC168	0.0490656	0.00464717	0.518042	0.012178
PF3D7_0100100_DBLδ1	DC3	0.0373284	0.00283423	0.491637	0.0124259
PF3D7_0700100_CIDRα3.1	DC119	0.0666952	0.00789731	0.563261	0.0128715
PF3D7_1035100	WE34	0.0335521	0.00230368	0.488671	0.0129929
PF3D7_1255200_CIDRβ1	DC258	0.0307343	0.00196849	0.479859	0.013003
PF3D7_0300100_CIDRα2.4	DC19	0.0533562	0.00527699	0.53949	0.0130353
PF3D7_0632800_CIDRβ1	DC117	0.0298213	0.00185335	0.479841	0.0132107
PF3D7_0833500_DBLδ1	DC185	0.0228208	0.00114185	0.456093	0.0133701
PF3D7_0811600	WE74.2	0.00670424	0.00012634	0.355761	0.0135096
PF3D7_0324900_DBLα0.9	DC22	0.00892686	0.000209154	0.381006	0.0137458
PF3D7_0214900	WE66	0.0173751	0.000688061	0.438759	0.0138913
PF3D7_0900100_DBLδ1	DC189	0.0200822	0.000885709	0.455338	0.0141266
PF3D7_1320000	WE75.1	0.0311772	0.00193854	0.501418	0.0144015
PF3D7_1200400_DBLβ5	DC227	0.0590269	0.00611588	0.569692	0.0144275
PF3D7_1012200	WE5	0.0331625	0.00215406	0.510547	0.0146086
PF3D7_0502500	WE54	0.0265152	0.0014349	0.489971	0.014711
PF3D7_0808600_CIDRγ2	DC174	0.0263605	0.00141582	0.490794	0.0148073
PF3D7_1255200_DBLα0.19	DC255	0.00387362	4.43e-05	0.338962	0.0149249
PF3D7_1200400_CIDRα5	DC226	0.0102307	0.000255091	0.41031	0.0149747
PF3D7_0423800	WE20	0.073276	0.00890975	0.60264	0.0150538
PF3D7_0712000_DBLδ1	DC128	0.0133104	0.000407452	0.43482	0.0151738
PF3D7_0712300_CIDRγ10	DC133	0.0487773	0.00419492	0.567168	0.0158196
PF3D7_1028700	WE29	0.098267	0.0148084	0.652089	0.0162689
PF3D7_0206800	WE3	0.00527678	7.32e-05	0.380455	0.0162722
PF3D7_1200100_DBLδ1	DC223	0.0210775	0.0008965	0.495552	0.0165833
PF3D7_1041300_CIDRα2.7	DC202	0.0780648	0.00965513	0.631179	0.0167782
PF3D7_0410700	WE60	0.0204655	0.000843376	0.49662	0.0168403
PF3D7_0506900	WE44	0.0460438	0.00366186	0.578949	0.0171659
PF3D7_0533100_DBLα1.4	DC85	0.0132806	0.000378032	0.466561	0.0173202
PF3D7_0412400_DBLδ1	DC40	0.0305337	0.00172416	0.540733	0.0173462
PF3D7_1335100	WE16	0.0791974	0.00971559	0.645584	0.0178471
PF3D7_0200100_CIDRα2.2	DC12	0.0153042	0.000475838	0.492221	0.018261
PF3D7_1240600_DBLα0.20	DC251	0.128717	0.0232868	0.711477	0.0187612
PF3D7_0800100_CIDRβ1	DC158	0.0472983	0.00369151	0.606021	0.0190325
PF3D7_0310400	WE77	0.0659501	0.0067629	0.643129	0.0192898
PF3D7_1400400	RS215	30.9748	1.74549	549.667	0.0193042
PF3D7_0400100_CIDRβ1	DC30	0.0297311	0.00155926	0.566898	0.0194205
PF3D7_1200600_DBLpam3	DC234	0.00184761	9.34e-06	0.365399	0.0196365
PF3D7_0426000_DBLδ1	DC79	0.040057	0.00265002	0.60549	0.0202276
PF3D7_0900100_CIDRα3.4	DC188	0.0743871	0.00808883	0.684084	0.0217108
PF3D7_0420700_CIDRα3.2	DC55	0.0648206	0.00621969	0.67555	0.0221383
PF3D7_0100100_CIDRβ1	DC4	0.0775263	0.00866765	0.69342	0.0221657
PF3D7_0400100_DBLδ	DC29	0.0458287	0.00324829	0.646579	0.0224355
PF3D7_1469200	WE19	0.030782	0.00154369	0.61381	0.0226288
PF3D7_0500100_CIDRβ1	DC84	0.0633337	0.00588806	0.681236	0.0228036
PF3D7_1200400_DBLe4	DC230	0.0278673	0.00126112	0.615792	0.0233903
PF3D7_1200100_DBLα0.9	DC221	0.0549438	0.00446061	0.676773	0.0235283
PF3D7_0300100_CIDRβ1	DC21	0.04501	0.00306997	0.659908	0.0236113
PF3D7_0712300_CIDRα0.1	DC131	0.0948677	0.0123283	0.73002	0.0236816
PF3D7_0712800_DBLα0.9	DC142	0.0126465	0.000275132	0.581305	0.0252363
PF3D7_0712600_DBLδ1	DC140	0.0221934	0.000783213	0.628879	0.0256254
PF3D7_1300300_DBLγ12	DC266	0.0377107	0.00211927	0.671031	0.0256409
PF3D7_1200600_CIDRpam	DC233	0.030587	0.00142988	0.654296	0.0256519
PF3D7_1240400_CIDRβ1	DC250	0.117997	0.0180392	0.771829	0.0257285
PF3D7_1300300_DBLβ9	DC269	0.0309026	0.0014514	0.657966	0.0258624
PF3D7_0421100_DBLα0.8	DC62	0.056316	0.00445591	0.71175	0.0262347
PF3D7_0502400	WE37	0.0505632	0.00362323	0.705624	0.0264684
PF3D7_1218000	WE17	0.0713154	0.00688338	0.738865	0.0268487
PF3D7_0833400	RS124	0.0465861	0.00306657	0.707718	0.0271714
PF3D7_0732400	RS103	30.2886	1.43677	638.515	0.0283066
PF3D7_0800100_CIDRα2.11	DC156	0.0640034	0.0054793	0.747621	0.0283843
PF3D7_0711000	WE73.1	0.116189	0.016874	0.800045	0.0287703
PF3D7_0712900_DBLδ1	DC148	0.0328402	0.00151688	0.710982	0.0294491
PF3D7_0828800	WE43	0.0765633	0.00732935	0.79979	0.0318228
PF3D7_0620400	MSP10_full	0.0357436	0.00169708	0.752826	0.0321447
PF3D7_0101600	RS7	0.101308	0.0124397	0.825044	0.0323765
PF3D7_1000100_CIDRα3.1	DC198	0.0956547	0.0110403	0.828766	0.0331312
PF3D7_0731500	WE86.2	0.151593	0.0263691	0.87149	0.0345029
PF3D7_1476200	PF14.3	0.0190769	0.000452095	0.804983	0.038115
PF3D7_0632500_DBLe7	DC112	0.0207797	0.000528536	0.816965	0.0386478
PF3D7_1240400_DBLα0.16	DC247	0.000131928	2.74e-08	0.635612	0.0389476
PF3D7_0929400	WE80.2	0.0794553	0.00714074	0.884102	0.0393787
PF3D7_1219300_DBLδ1	DC240	0.10021	0.0112113	0.895714	0.0395372
PF3D7_0800200_DBLz5	DC163	0.01023	0.000129858	0.805904	0.0396998
PF3D7_0808600_DBLδ1	DC173	0.0306758	0.00110738	0.849755	0.0397756
PF3D7_0424200	WE89	0.0606533	0.00416177	0.883956	0.0403415
PF3D7_1136900	WE78.1	0.0248465	0.000717114	0.860878	0.0410704
PF3D7_0808700_DBLα0.2	DC175	0.056355	0.00353748	0.897781	0.0417156
PF3D7_0212600	WE4	0.0613246	0.00415844	0.904355	0.04203
PF3D7_1476200	PF14.2	0.00654489	4.88e-05	0.877442	0.0441867
PF3D7_1000100_CIDRγ4	DC200	0.0290355	0.00091954	0.91683	0.0445056
PF3D7_0620400	MSP10_1-2	0.134579	0.0187273	0.96712	0.0462367
PF3D7_0712800_DBLδ1	DC144	0.0219559	0.000511576	0.94231	0.046483
PF3D7_0712400_DBLβ6	DC136	0.0382934	0.00154266	0.950555	0.0464869
PF3D7_0324900_DBLδ1	DC24	0.0745012	0.0057145	0.971288	0.0474527
PF3D7_0533100_DBLβ1	DC87	0.0609772	0.00374538	0.99275	0.0494013
PF3D7_0220000	WE87.2	0.13303	0.0177239	0.998475	0.0498226
PF3D7_0115700_DBLδ1	DC9	0.0524427	0.00273333	1.00618	0.0504759
PF3D7_1479600	RS228	60.317	0.960444	3787.98	0.0522713
PF3D7_0617400_DBLδ1	DC104	0.0373413	0.00131458	1.0607	0.0541683
PF3D7_1300100_DBLδ1	DC261	0.0547433	0.00282576	1.06054	0.0547152
PF3D7_0201300	RS27	0.0942308	0.00839478	1.05773	0.0555557
PF3D7_1000100_DBLα0.20	DC197	0.025442	0.000580135	1.11576	0.0570124
PF3D7_0413100_DBLα0.1	DC50	0.0795597	0.0057782	1.09545	0.0585095
PF3D7_1240400_DBLδ1	DC249	0.102212	0.00961921	1.08608	0.058556
PF3D7_0100300_DBLe8	DC6	0.0521213	0.00243885	1.1139	0.0586302
PF3D7_0711700_DBLδ1	DC124	0.0629957	0.00355343	1.1168	0.0594708
PF3D7_1364100	WE47	0.0721217	0.00463044	1.12334	0.0605212
PF3D7_0423900	EH14	22.9991	0.857492	616.869	0.0617083
PF3D7_0104200	WE27	0.105538	0.0099549	1.11888	0.061936
PF3D7_0632500_CIDRγ1	DC111	0.0960038	0.00808325	1.14022	0.0634446
PF3D7_0808600_CIDRα3.2	DC172	0.0449345	0.00159632	1.26485	0.0684518
PF3D7_0400100_DBLα0.5	DC26	0.0549569	0.0023997	1.2586	0.0693656
PF3D7_0833500_DBLα0.17	DC183	0.0363761	0.00100007	1.32313	0.0707164
PF3D7_1200400_DBLα0.18	DC225	0.0558275	0.00229367	1.35883	0.0764394
PF3D7_0425800_DBLα1.4	DC70	0.00466591	1.22e-05	1.7852	0.0768938
PF3D7_0712300_DBLα0.1	DC130	0.226073	0.0433736	1.17835	0.0775349
PF3D7_0935800	WE79.2	0.000603671	1.55e-07	2.35608	0.0789387
PF3D7_1136900	WE78.2	0.124651	0.0121713	1.2766	0.0793851
PF3D7_0712600_DBLα0.1	DC138	0.0190577	0.000226108	1.60629	0.0800295
PF3D7_0632500_CIDRα3.2	DC107	0.235956	0.0467879	1.18995	0.0802329
PF3D7_0300400	RS40	0.121546	0.0112565	1.31244	0.082558
PF3D7_0712900_DBLα0.20	DC146	0.0287985	0.000517516	1.60257	0.0836291
PF3D7_0223500_DBLδ1	DC16	0.0643622	0.00282496	1.46639	0.0854349
PF3D7_1041300_DBLδ1	DC203	0.0748601	0.00384	1.45938	0.0871646
PF3D7_0412400_DBLα0.17	DC38	0.0379027	0.000879748	1.63298	0.0882737
PF3D7_0533100_DBLe1	DC92	0.106705	0.0080136	1.42082	0.0902478
PF3D7_0302500	WE83.2	0.255323	0.0516288	1.26267	0.0941266
PF3D7_0200100_DBLα0.7	DC11	0.234628	0.0427623	1.28735	0.0950814
PF3D7_0426000_DBLα0.14	DC77	0.0285312	0.000432985	1.88005	0.0960016
PF3D7_0711700_DBLα0.1	DC122	0.0656771	0.00259335	1.66329	0.0986511
PF3D7_0707300	WE48	0.142795	0.0140663	1.4496	0.0997626
PF3D7_0832500	RS117	0.0690488	0.00281738	1.69225	0.101487
PF3D7_0800300_DBLα2	DC165	0.075337	0.00338441	1.677	0.102382
PF3D7_0617400_CIDRβ1	DC105	0.209281	0.0319914	1.36907	0.10264
PF3D7_0937600_DBLe8	DC192	0.0780139	0.00363281	1.67533	0.103054
PF3D7_1254300	RS186	81.7524	0.408498	16361.1	0.103344
PF3D7_1300300_DBLβ3	DC265	0.154146	0.0160144	1.48373	0.105559
PF3D7_0420700_DBLα0.1	DC54	0.0323765	0.000482587	2.17212	0.109927
PF3D7_1373300	RS210	13.8516	0.550394	348.598	0.110231
PF3D7_1252100	WE92.3	0.279567	0.0578354	1.35138	0.112872
PF3D7_1036300	WE46	0.0339098	0.000498117	2.30845	0.116065
PF3D7_0631900	RS80	34.2237	0.407246	2876.06	0.118134
PF3D7_0600400_DBLe8	DC100	0.0936438	0.00475606	1.84378	0.119327
PF3D7_1105300	WE55	0.112096	0.00696336	1.80451	0.122678
PF3D7_0900300	RS126	0.127174	0.00913744	1.76998	0.124784
PF3D7_0800700	RS251	10.7322	0.515859	223.279	0.125385
PF3D7_1477600	RS242	11.334	0.50627	253.738	0.125817
PF3D7_1206000	WE8	0.087471	0.00379776	2.01465	0.127923
PF3D7_0800200_DBLα1.6	DC159	0.147522	0.0123143	1.76727	0.130905
PF3D7_0800300_DBLβ1	DC167	2.3e-05	1.99e-11	26.5288	0.1337
PF3D7_0424400	RS253	7.10719	0.532974	94.7742	0.137847
PF3D7_0204100	WE93.1	6.99036	0.527904	92.5644	0.140129
PF3D7_0201200	RS25	5.64011	0.562891	56.5133	0.141223
PF3D7_0300100_DBLα0.9	DC18	0.0375549	0.000460261	3.06428	0.143913
PF3D7_0402200	RS256	0.195232	0.0215947	1.76503	0.145888
PF3D7_0832000	RS114	12.2172	0.417308	357.676	0.146296
PF3D7_1036500	WE52	0.164024	0.0143034	1.88095	0.146388
PF3D7_0632800_DBLα0.8	DC114	0.0239429	0.000152017	3.77104	0.148236
PF3D7_0905400	WE58.2	0.0599974	0.00131729	2.73265	0.148729
PF3D7_0733000_DBLδ1	DC152	0.131433	0.00819219	2.10868	0.151826
PF3D7_0115700_CIDRβ1	DC10	0.352221	0.0838449	1.47963	0.154165
PF3D7_0631800	RS79	10.4528	0.411813	265.319	0.154933
PF3D7_0402200	RS259	12.115	0.385603	380.633	0.156131
PF3D7_0830800	RS248	18.7331	0.316984	1107.09	0.159141
PF3D7_1479400	RS225	25.6205	0.279199	2351.05	0.159526
PF3D7_1100200_DBLα1.5	DC209	0.0958666	0.00365005	2.51788	0.159661
PF3D7_0901400	RS137	0.0825381	0.00252547	2.69753	0.160858
PF3D7_0809100_DBLα0.12	DC179	0.0537595	0.000899667	3.2124	0.16128
PF3D7_0420900_DBLα0.1	DC58	0.138204	0.00863807	2.21118	0.161804
PF3D7_0222500	RS29	8.26349	0.423648	161.184	0.163514
PF3D7_0600200_DBLα2	DC93	0.0930499	0.0029756	2.90976	0.1764
PF3D7_1463900	WE71	0.0101908	1.3e-05	8.00012	0.177481
PF3D7_0533100_DBL5	DC89	0.0497571	0.000628405	3.93976	0.178536
PF3D7_1254600	RS190	12.1481	0.316499	466.275	0.179652
PF3D7_0617600	RS76	10.8059	0.333279	350.359	0.179937
PF3D7_0713000	RS97	0.251447	0.0331263	1.90862	0.18189
PF3D7_1014100	WE85.1	0.284298	0.0444863	1.81686	0.183835
PF3D7_1116000	WE98.1	0.224418	0.0246626	2.04209	0.184746
PF3D7_0200600	RS21	0.155677	0.00975037	2.48559	0.188224
PF3D7_0617400_CIDRα2.1	DC102	0.28217	0.0424377	1.87616	0.190531
PF3D7_0500100_DBLα0.11	DC81	0.0886638	0.00234907	3.34656	0.190896
PF3D7_0732400	RS104	6.37717	0.386205	105.302	0.195319
PF3D7_0401000	RS57	6.2468	0.38772	100.646	0.196396
PF3D7_0533100_DBLγ8	DC90	0.180926	0.0135107	2.42283	0.196528
PF3D7_0401600	RS61	35.7411	0.142945	8936.49	0.20427
PF3D7_1150200	RS176	6.37326	0.359663	112.935	0.206665
PF3D7_0700300	RS90	0.244861	0.0274078	2.18758	0.207896
PF3D7_0100600	RS3	0.258972	0.0315311	2.127	0.208563
PF3D7_0800700	RS250	4.41442	0.425732	45.7732	0.213364
PF3D7_1001700	EH11	6.12638	0.329824	113.796	0.224012
PF3D7_1101300	RS171	7.04005	0.302609	163.783	0.224166
PF3D7_1150300	RS177	4.7709	0.380278	59.855	0.225974
PF3D7_0500500	RS70	5.35284	0.349661	81.9447	0.228146
PF3D7_1436300	WE63	0.328126	0.0529363	2.03389	0.231212
PF3D7_1372800	RS206	0.11323	0.00309625	4.14085	0.23553
PF3D7_1254700	RS192	12.6753	0.189516	847.751	0.236277
PF3D7_1400300	RS214	0.167796	0.00858038	3.28138	0.23932
PF3D7_1254000	RS182	0.00277774	1.53e-07	50.4575	0.239454
PF3D7_0400900	RS56	5.26936	0.326833	84.9552	0.241351
PF3D7_0221400	RS28	6.68625	0.273483	163.469	0.244006
PF3D7_0732000	RS98	4.73161	0.334356	66.9588	0.250288
PF3D7_0700300	RS91	0.200766	0.0128462	3.13765	0.252315
PF3D7_0819600	EH7	0.163385	0.00728434	3.66465	0.253618
PF3D7_1373100	RS209	6.31973	0.264633	150.922	0.254774
PF3D7_0100300_DBLα1.3	DC5	0.253296	0.0235717	2.72186	0.257012
PF3D7_1351800	EH15	0.35522	0.0590782	2.13584	0.258111
PF3D7_0300400	RS39	4.28324	0.343151	53.4637	0.25868
PF3D7_1301800	RS239	7.44777	0.227515	243.805	0.259255
PF3D7_0202500	EH28	12.4886	0.154659	1008.45	0.259782
PF3D7_1412000	WE11	0.289674	0.0333809	2.51374	0.261066
PF3D7_0425500	RS66	53.0854	0.0508094	55463.4	0.262765
PF3D7_0115700_DBLα0.5	DC7	0.272776	0.0273064	2.72488	0.268585
PF3D7_0223400	RS37	7.78653	0.201271	301.236	0.271136
PF3D7_0200400	RS236	5.1719	0.275488	97.0952	0.272068
PF3D7_0733000_DBLα0.16	DC150	2.73e-12	6.13e-33	1215712718	0.272355
PF3D7_1255000	RS195	0.0047325	3.27e-07	68.5648	0.273462
PF3D7_0800200_DBLe4	DC164	0.10902	0.00204259	5.81872	0.274768
PF3D7_0401200	RS58	0.214946	0.0135282	3.41523	0.275916
PF3D7_1301600	WE72	0.00291635	7.51e-08	113.182	0.278896
PF3D7_1240600_CIDRα3.1	DC252	0.259688	0.0221644	3.04261	0.282911
PF3D7_1002100	EH29	3.15052	0.386809	25.6606	0.283543
PF3D7_0800500	RS110	10.729	0.13762	836.437	0.285671
PF3D7_0402100	EH9	3.48289	0.348208	34.837	0.288193
PF3D7_1200300	RS179	3.48403	0.345791	35.1034	0.289591
PF3D7_1479600	RS229	0.290718	0.0289984	2.91453	0.293515
PF3D7_0832400	RS116	0.225111	0.0138548	3.65757	0.294491
PF3D7_0514200	WE57	0.0859795	0.000862834	8.56766	0.29598
PF3D7_1041300_DBLα0.9	DC201	0.11222	0.00185566	6.78645	0.295992
PF3D7_0425700	RS67	3.79946	0.310399	46.5075	0.296234
PF3D7_1400800	RS221	0.237312	0.0156844	3.59064	0.299394
PF3D7_0930300	EH31.1	0.421903	0.0825403	2.15655	0.299854
PF3D7_0115200	RS11	4.61287	0.254373	83.651	0.301101
PF3D7_0732500	RS105	3.99253	0.282554	56.4151	0.305549
PF3D7_0935800	WE79.1	0.0230851	1.66e-05	32.074	0.307398
PF3D7_0712000_DBLα0.17	DC126	0.144394	0.0034771	5.99625	0.30873
PF3D7_0100900	RS5	0.37278	0.0550722	2.52332	0.311846
PF3D7_0832900	RS119	0.167082	0.00489083	5.70789	0.320631
PF3D7_0200700	RS22	0.241763	0.0144871	4.03459	0.322826
PF3D7_0937700	RS144	0.207775	0.00912818	4.72935	0.324383
PF3D7_0730800	EH39	0.361799	0.0475273	2.75417	0.32624
PF3D7_0201000	RS23	4.33405	0.230171	81.6087	0.327487
PF3D7_1400300	RS213	4.20083	0.235029	75.0845	0.329232
PF3D7_0715200	WE91.1	0.170224	0.0046953	6.17134	0.333769
PF3D7_0424400	RS252	0.208432	0.00863187	5.03295	0.33441
PF3D7_0324400	RS44	0.245739	0.0138097	4.37283	0.339317
PF3D7_1101300	RS172	0.271646	0.0186592	3.9547	0.340194
PF3D7_1100500	RS167	3.91166	0.234125	65.3544	0.34242
PF3D7_1000200	RS145	3.897	0.233653	64.9964	0.343452
PF3D7_0632200	RS85	6.60799	0.128083	340.915	0.347963
PF3D7_0600300	RS73	4.25162	0.203713	88.7341	0.350491
PF3D7_0833100	RS122	3.06819	0.290821	32.3696	0.351027
PF3D7_0732200	RS101	4.30221	0.199794	92.6403	0.3515
PF3D7_1125800	EH10	0.18291	0.00501613	6.66967	0.354537
PF3D7_0700500	RS94	0.234734	0.0107736	5.11437	0.356593
PF3D7_0900100_DBLα0.16	DC187	0.0973293	0.000685951	13.81	0.356784
PF3D7_1240300_DBLβ8	DC244	0.333414	0.0312849	3.55331	0.36293
PF3D7_1373500_CIDRβ6	DC273	0.215787	0.00768163	6.06175	0.367535
PF3D7_0830800	RS247	0.262692	0.0142563	4.84046	0.368546
PF3D7_0402600	RS62	6.28943	0.112717	350.941	0.37016
PF3D7_1254800	RS193	0.376299	0.0438661	3.22803	0.372761
PF3D7_1200600_DBLepam4	DC235	43.4938	0.0105522	179272	0.374374
PF3D7_0732300	RS102	3.36861	0.227301	49.923	0.377263
PF3D7_0400400_DBLα1.2	DC31	9.43e-07	3.69e-20	2.4101e+07	0.378394
PF3D7_0114700	RS10	2.48538	0.323072	19.1198	0.381796
PF3D7_1480000	RS234	3.19778	0.23271	43.9424	0.384582
PF3D7_1400700	RS220	0.239964	0.00953783	6.0373	0.385743
PF3D7_1479900	RS232	0.360303	0.0354544	3.66156	0.388197
PF3D7_0324400	RS45	3.35575	0.211078	53.3504	0.390988
PF3D7_0901000	RS133	0.271903	0.0137062	5.39397	0.392896
PF3D7_0413300	RS64	3.83462	0.171917	85.5312	0.396169
PF3D7_0112900	EH17	0.171	0.00284274	10.2862	0.398158
PF3D7_1252100	WE92.1	0.360873	0.0337653	3.85691	0.399101
PF3D7_1100400	RS166	0.427949	0.0589699	3.10566	0.401278
PF3D7_1253700	RS181	0.406358	0.0489685	3.3721	0.40422
PF3D7_1300600	RS200	0.320301	0.0218685	4.69135	0.405791
PF3D7_1200200	RS178	0.321183	0.0217461	4.74378	0.408385
PF3D7_1301800	RS238	0.305321	0.01827	5.10243	0.408961
PF3D7_0424600	EH18	0.334739	0.0248516	4.50879	0.409443
PF3D7_0700100_DBLα0.1	DC118	0.210001	0.00507875	8.68336	0.411179
PF3D7_0100800	RS4	0.492539	0.0903474	2.68514	0.413095
PF3D7_1200400_DBLγ14	DC228	0.273735	0.0122041	6.13978	0.414262
PF3D7_0700200	RS89	0.397273	0.0415646	3.79712	0.422828
PF3D7_1000600	RS150	0.394745	0.0395734	3.93759	0.428315
PF3D7_0201300	RS26	0.434149	0.0549496	3.43015	0.428835
PF3D7_0700400	RS92	0.20749	0.00414418	10.3886	0.430892
PF3D7_1404800	EH37	3.51338	0.153158	80.5954	0.431781
PF3D7_1452000	WE90.1	0.306877	0.0155867	6.04189	0.437181
PF3D7_0115600	RS15	3.31209	0.160811	68.2163	0.437793
PF3D7_0101000	RS6	0.443797	0.0566655	3.47576	0.439152
PF3D7_0109000	EH6	0.3112	0.0160997	6.01536	0.439802
PF3D7_0617400_DBLβ4	DC103	0.397098	0.0380955	4.13926	0.439972
PF3D7_0732000	RS99	2.06805	0.320289	13.3531	0.445128
PF3D7_1030200	EH35	0.000165989	3.26e-14	844298	0.445301
PF3D7_1446600	EH5	0.261503	0.00832806	8.21126	0.445629
PF3D7_0115000	RS261	2.6662	0.211628	33.5903	0.448066
PF3D7_0831100	RS244	0.382664	0.0318771	4.59364	0.448707
PF3D7_0324500	RS46	0.498238	0.0809491	3.06664	0.452412
PF3D7_1000500	RS148	4.04452	0.104553	156.459	0.453706
PF3D7_0930300	EH31	0.464439	0.0618166	3.48941	0.456042
PF3D7_1000300	RS146	0.311539	0.0140529	6.9065	0.460715
PF3D7_1150400_CIDRα1.4	DC216	0.404639	0.0358419	4.56821	0.464409
PF3D7_0113600	RS269	0.306488	0.0122997	7.63718	0.471024
PF3D7_0900900	RS131	0.262811	0.00688755	10.0282	0.472006
PF3D7_0731500	WE86.1	0.441238	0.0473545	4.11135	0.472455
PF3D7_0833200	RS123	0.437793	0.0458268	4.18232	0.473156
PF3D7_1140400	EH30	9.58778	0.0197449	4655.67	0.473807
PF3D7_0400800	RS55	0.494195	0.0717165	3.40547	0.474174
PF3D7_0425900	RS68	0.587576	0.134078	2.57497	0.480587
PF3D7_0400500	RS52	2.91078	0.147709	57.3602	0.482368
PF3D7_0632000	RS82	2.12369	0.257649	17.5047	0.484026
PF3D7_0300700	RS42	2.66834	0.166219	42.8353	0.48832
PF3D7_1040000	RS151	2.54758	0.179261	36.2051	0.48982
PF3D7_0222800	RS33	3.98538	0.0781767	203.172	0.490629
PF3D7_0900700	RS130	0.334821	0.0149015	7.52305	0.490763
PF3D7_1040300	RS155	2.65233	0.164996	42.6363	0.491205
PF3D7_1000600	RS149	3.28206	0.110815	97.2061	0.491785
PF3D7_1400600	RS218	0.36083	0.019724	6.60103	0.491843
PF3D7_0113100	RS266	0.427981	0.0375739	4.87486	0.494133
PF3D7_0532900	RS71	2.18463	0.231142	20.6478	0.495311
PF3D7_0612700	WE13	0.0146374	7.58e-08	2825.56	0.49633
PF3D7_0732900	RS108	0.460312	0.0485976	4.36002	0.498815
PF3D7_0421200	RS65	0.386031	0.0240325	6.20079	0.501634
PF3D7_1300200	RS197	0.356247	0.0174456	7.27474	0.502458
PF3D7_0220800	WE84.2	0.463978	0.0491562	4.37942	0.502551
PF3D7_0318700	EH20	4.47821	0.055852	359.062	0.50271
PF3D7_0324800	RS50	0.372913	0.0206693	6.72805	0.503903
PF3D7_1400200	RS212	2.55165	0.158676	41.033	0.508613
PF3D7_0115300	RS12	0.467863	0.0478592	4.57374	0.513757
PF3D7_1479400	RS224	0.292664	0.00716247	11.9585	0.516266
PF3D7_0632200	RS84	0.217806	0.00198565	23.8911	0.524828
PF3D7_1400500	RS217	2.47999	0.150064	40.9847	0.525652
PF3D7_0324600	RS49	2.19953	0.171721	28.1732	0.544623
PF3D7_1141800	EH24	1.67386	0.31233	8.97066	0.547569
PF3D7_0808600_DBLα0.15	DC171	0.37282	0.0144794	9.59943	0.551622
PF3D7_1372700	RS205	0.41044	0.0216594	7.77771	0.552965
PF3D7_0632500_DBLα0.6	DC106	1.70623	0.290411	10.0244	0.55426
PF3D7_0507400	EH33	0.558807	0.0800651	3.90014	0.557167
PF3D7_0732200	RS100	2.15508	0.162399	28.5986	0.560523
PF3D7_1204900	EH19	2.32549	0.131808	41.0288	0.56443
PF3D7_0617600	RS77	2.30831	0.133548	39.898	0.565071
PF3D7_1479900	RS233	0.36036	0.0106102	12.2391	0.570398
PF3D7_1255100	RS196	2.12881	0.15316	29.5888	0.573647
PF3D7_0533100_DBLz1	DC91	0.425928	0.0216017	8.39817	0.574749
PF3D7_1041200	RS164	0.461758	0.0309188	6.89613	0.575363
PF3D7_0413200	RS63	2.50663	0.100606	62.4533	0.575384
PF3D7_1301800	RS237	1.98442	0.17778	22.1506	0.57768
PF3D7_0501600	EH2	2.24268	0.126977	39.6106	0.581423
PF3D7_0900400	RS127	0.475427	0.033311	6.78547	0.583542
PF3D7_0732700	RS107	1.86946	0.19265	18.1411	0.589467
PF3D7_0901300	RS136	0.461866	0.0275887	7.73217	0.591056
PF3D7_0113100	RS267	2.2465	0.117237	43.0477	0.591116
PF3D7_0808800	RS111	2.05535	0.147997	28.5442	0.591472
PF3D7_0937500	RS143	0.491825	0.0366458	6.60081	0.59223
PF3D7_0100100_CIDRα2.8	DC2	0.586342	0.0824712	4.16869	0.593718
PF3D7_0715200	WE91.2	0.403095	0.0143033	11.36	0.593763
PF3D7_1300900	RS202	0.504667	0.0407246	6.25392	0.594374
PF3D7_0800100_DBLα0.9	DC155	0.174362	0.000268749	113.124	0.597014
PF3D7_1041300_CIDRβ1	DC204	0.482411	0.0313349	7.42688	0.601269
PF3D7_0600200_DBLz3	DC97	1.78525	0.193885	16.4381	0.608882
PF3D7_0937600_DBLα1.3	DC191	0.336682	0.00496775	22.8181	0.612806
PF3D7_0223200	RS36	0.461903	0.0224526	9.50243	0.616625
PF3D7_0100200	RS1	0.56997	0.0616146	5.27255	0.620398
PF3D7_0400300	RS51	0.419965	0.0134055	13.1566	0.621537
PF3D7_1040500	RS157	0.498722	0.0299176	8.31362	0.627932
PF3D7_1361500	EH21	0.556281	0.0504028	6.1395	0.63214
PF3D7_0300800	RS43	1.85396	0.143093	24.0204	0.636681
PF3D7_1041000	RS162	0.562663	0.051633	6.13154	0.636997
PF3D7_0201000	RS24	1.8768	0.135981	25.9036	0.638275
PF3D7_1400800	RS222	0.571405	0.052721	6.19304	0.645302
PF3D7_1373400	RS211	0.517512	0.0303091	8.83623	0.64911
PF3D7_1150400_DBLα1.7	DC215	0.508768	0.0268021	9.65762	0.652731
PF3D7_0424400	RS255	0.501826	0.0245751	10.2473	0.654148
PF3D7_1300100_DBLα0.11	DC259	0.361005	0.00393492	33.12	0.658558
PF3D7_1100300	RS165	1.52257	0.231641	10.0079	0.661676
PF3D7_0900600	RS129	1.94638	0.0969879	39.0604	0.663399
PF3D7_1014100	WE85	0.612555	0.0651177	5.76223	0.668232
PF3D7_0929400	WE80.1	4.42317	0.00458914	4263.21	0.671463
PF3D7_0402200	RS257	3.29574	0.0126355	859.631	0.67439
PF3D7_0402200	RS258	0.573985	0.0430138	7.65937	0.674529
PF3D7_0832900	RS120	0.583261	0.0464947	7.31682	0.676111
PF3D7_1320000	WE75.2	1.61148	0.169911	15.2836	0.677614
PF3D7_0204100	WE93.2	0.468297	0.0127885	17.1483	0.67962
PF3D7_1035800	WE40	0.462856	0.0113239	18.9189	0.684069
PF3D7_1030200	EH34	1.68444	0.134989	21.0189	0.685539
PF3D7_0400700	RS53	1.5923	0.163604	15.4973	0.688653
PF3D7_0900900	RS132	1.41812	0.253374	7.9371	0.690954
PF3D7_0419400	WE94.1	0.648663	0.0751988	5.59536	0.693791
PF3D7_0222800	RS32	1.87798	0.0799257	44.1261	0.695597
PF3D7_0900200	RS125	1.61419	0.144667	18.0111	0.697219
PF3D7_0100400	RS2	1.54381	0.171436	13.9023	0.698558
PF3D7_1300300_CIDRδ1	DC264	0.632605	0.061842	6.47116	0.699513
PF3D7_0808900	RS112	0.52061	0.0183138	14.7995	0.702304
PF3D7_0631900	RS81	1.82894	0.0814166	41.0854	0.703755
PF3D7_0701800	RS96	0.486578	0.0115471	20.5037	0.705864
PF3D7_1254600	RS191	0.582557	0.034463	9.84746	0.707998
PF3D7_0632800_DBLδ1	DC116	0.399096	0.00318583	49.9956	0.709365
PF3D7_0901000	RS134	0.605526	0.0427838	8.57009	0.710603
PF3D7_1027300	EH3	0.536054	0.0198799	14.4545	0.710676
PF3D7_0424400	RS254	0.503289	0.0133348	18.9954	0.710905
PF3D7_0302500	WE83.1	0.629465	0.0535422	7.40027	0.712766
PF3D7_0701100	RS95	1.59604	0.132163	19.2743	0.713002
PF3D7_1102800	EH27	2.01998	0.0465932	87.573	0.714672
PF3D7_1477600	RS241	0.571593	0.0282288	11.5739	0.715525
PF3D7_1410400	EH1	0.588807	0.0323039	10.7323	0.720631
PF3D7_0937400	RS142	0.55993	0.0224988	13.9351	0.723617
PF3D7_1372800	RS207	0.598144	0.0332217	10.7694	0.727489
PF3D7_0401300	RS59	1.54574	0.12873	18.5606	0.731284
PF3D7_0201700	EH32	0.723792	0.114099	4.59141	0.731639
PF3D7_1002100	EH29.1	1.44924	0.170938	12.287	0.733683
PF3D7_0632700	RS88	0.612446	0.0352527	10.64	0.736415
PF3D7_0833000	RS121	1.71322	0.0744471	39.4256	0.736509
PF3D7_1310200	WE1	1.88967	0.0460854	77.4837	0.73696
PF3D7_0300200	RS38	1.47087	0.154591	13.9947	0.737097
PF3D7_0102700	EH16	1.62054	0.0959441	27.3715	0.737827
PF3D7_1373000	RS208	5.29487	0.000302437	92699	0.738109
PF3D7_0419400	WE94.2	1.39914	0.194764	10.051	0.738498
PF3D7_1136200	WE39	0.573302	0.0211067	15.5721	0.74121
PF3D7_1254400	RS188	0.635817	0.0415815	9.72219	0.744843
PF3D7_0617700	RS78	1.64346	0.081666	33.0731	0.745659
PF3D7_0101900	RS9	0.740178	0.119874	4.57033	0.745993
PF3D7_1353200	EH23	1.34346	0.221113	8.16272	0.748422
PF3D7_1479500	RS227	0.634162	0.038966	10.3208	0.748967
PF3D7_0300500	RS41	1.45378	0.145764	14.4992	0.749831
PF3D7_1150000	RS175	1.75902	0.0536978	57.6218	0.751054
PF3D7_0900500	RS128	2.39793	0.0107606	534.363	0.751191
PF3D7_0102500	WE88	1.31212	0.244728	7.03496	0.751201
PF3D7_1149900	RS174	1.84375	0.0393749	86.3344	0.755229
PF3D7_0901100	RS135	0.636386	0.0344626	11.7515	0.76129
PF3D7_0808900	RS113	1.57696	0.0825365	30.1299	0.762167
PF3D7_0115000	RS260	1.51387	0.100872	22.7198	0.764126
PF3D7_0113600	RS263	1.48035	0.107688	20.3501	0.769237
PF3D7_0532900	RS72	0.729261	0.0883603	6.01878	0.769373
PF3D7_0632300	RS86	0.643698	0.033432	12.3937	0.770344
PF3D7_1373500_DBLα0.16	DC270	0.417884	0.00102619	170.17	0.775958
PF3D7_1479500	RS226	0.653776	0.0343747	12.4343	0.777328
PF3D7_1040900	RS161	0.720696	0.07099	7.31655	0.781787
PF3D7_0324500	RS47	1.49556	0.0845106	26.4663	0.783659
PF3D7_1400400	RS216	1.37818	0.134537	14.1178	0.786999
PF3D7_0115400	RS13	0.813998	0.1706	3.8839	0.796307
PF3D7_0324600	RS48	1.55132	0.0456484	52.7202	0.807158
PF3D7_1252100	WE92.2	1.49064	0.0568375	39.0941	0.810705
PF3D7_1040700	RS159	1.33743	0.109134	16.3901	0.820108
PF3D7_1100500	RS168	1.3188	0.0952881	18.2523	0.836466
PF3D7_0220800	WE84.1	1.27664	0.12082	13.4896	0.839105
PF3D7_0632100	RS83	0.718506	0.0275393	18.746	0.842529
PF3D7_0600400_DBLα1.3	DC99	0.797426	0.0843553	7.53821	0.843428
PF3D7_1300500	RS199	0.706627	0.0223675	22.3235	0.843738
PF3D7_0200400	RS235	0.750452	0.0430618	13.0784	0.843926
PF3D7_0222700	RS31	0.773025	0.0571788	10.4509	0.84636
PF3D7_1479800	RS231	0.812811	0.0884901	7.46594	0.854656
PF3D7_1254100	RS184	1.28596	0.0838088	19.7316	0.856746
PF3D7_1404800	EH36	1.28381	0.0778532	21.1702	0.861308
PF3D7_1129100	WE25	1.25243	0.0996145	15.7465	0.861654
PF3D7_1243700	EH13	1.31266	0.0586748	29.3664	0.863771
PF3D7_0600700	RS75	1.25552	0.0825163	19.1034	0.869863
PF3D7_0507500	EH26	0.807048	0.0593041	10.9828	0.87214
PF3D7_1301800	RS240	1.20697	0.115294	12.6353	0.875243
PF3D7_0113600	RS264	1.36024	0.0268254	68.9742	0.87793
PF3D7_1254500	RS189	1.196	0.117835	12.1392	0.879677
PF3D7_1300700	RS201	0.792839	0.0388799	16.1676	0.880055
PF3D7_0732700	RS106	0.844904	0.0915098	7.80095	0.881863
PF3D7_0632400	RS87	1.257	0.0614014	25.7329	0.881955
PF3D7_0620400	MSP10_2-2	0.806502	0.0430683	15.1027	0.885612
PF3D7_1040400	RS156	0.828832	0.056334	12.1945	0.891145
PF3D7_1041100	RS163	0.862508	0.101508	7.32866	0.892226
PF3D7_0830600	EH12	1.16655	0.117959	11.5365	0.89517
PF3D7_1040800	RS160	1.19759	0.0813984	17.6197	0.895427
PF3D7_0901600	RS140	0.842443	0.0645556	10.9938	0.89592
PF3D7_0600500	RS74	0.813364	0.0365235	18.1133	0.896191
PF3D7_1040200	RS153	0.841398	0.0623748	11.3499	0.896498
PF3D7_1479700	RS230	1.16603	0.111169	12.2303	0.898074
PF3D7_1300400	RS198	1.18599	0.0861255	16.3316	0.898558
PF3D7_0901600	RS139	1.15818	0.109731	12.2243	0.902788
PF3D7_0223100	RS34	0.863287	0.0754532	9.87716	0.905891
PF3D7_1149800	RS173	1.23604	0.0366754	41.6574	0.906004
PF3D7_0831100	RS246	0.795494	0.0176885	35.7754	0.90621
PF3D7_0222600	RS30	0.87111	0.074897	10.1317	0.912231
PF3D7_0115000	RS262	0.843906	0.0405375	17.5683	0.912749
PF3D7_0901500	RS138	0.873398	0.0718393	10.6185	0.915414
PF3D7_0200200	RS16	0.83909	0.0315602	22.3089	0.916518
PF3D7_1254200	RS185	1.13617	0.102539	12.5893	0.917141
PF3D7_1255000	RS194	0.893667	0.101924	7.83564	0.919161
PF3D7_1352900	EH38	0.890619	0.0683869	11.5987	0.929514
PF3D7_0831100	RS245	0.887594	0.0610367	12.9074	0.930431
PF3D7_0800400	RS109	1.10954	0.102751	11.9813	0.931763
PF3D7_1477600	RS243	1.1124	0.0577662	21.4213	0.943731
PF3D7_0414900	EH8	1.07648	0.0967961	11.9716	0.952185
PF3D7_0401400	RS60	1.11015	0.0299584	41.138	0.954788
PF3D7_1400700	RS219	0.906494	0.0286822	28.6495	0.955566
PF3D7_1254300	RS187	1.0668	0.0852249	13.3536	0.960003
PF3D7_0223100	RS35	1.07	0.0724259	15.8078	0.960725
PF3D7_1101200	RS170	1.06798	0.0724218	15.7491	0.961794
PF3D7_0113600	RS265	0.941016	0.0634988	13.9453	0.964745
PF3D7_0832800	RS118	0.935137	0.0449448	19.4568	0.965458
PF3D7_0400800	RS54	1.03597	0.199022	5.39252	0.966511
PF3D7_0424400	RS268	0.949507	0.0700902	12.8629	0.968917
PF3D7_1148900	EH22	1.03245	0.176672	6.03347	0.97172
PF3D7_1000400	RS147	1.03773	0.114647	9.393	0.973715
PF3D7_1300900	RS203	0.955954	0.0584932	15.6231	0.974789
PF3D7_1040600	RS158	1.03586	0.0521873	20.5606	0.981564
PF3D7_0500400	RS69	1.02573	0.0800056	13.1506	0.984428
PF3D7_1372600	RS204	1.02376	0.0942041	11.1257	0.984607
PF3D7_1200500	RS180	0.984966	0.141803	6.8416	0.987778
PF3D7_0200500	RS20	1.01675	0.0664131	15.566	0.990478
PF3D7_1100100_DBLα0.15	DC205	0	0	Inf	0.993527
PF3D7_1300300_DBLα1.6	DC263	2.18e-18	0	Inf	0.994401
PF3D7_0920700	EH25	1.03e+51	0	Inf	0.994546
PF3D7_0937300	RS141	5.73e+112	0	Inf	0.994546
PF3D7_1101100	RS169	1.33e+79	0	Inf	0.994546
PF3D7_0100100_DBLα0.11	DC1	3.9e+79	0	Inf	0.99469
PF3D7_0115400	RS14	Inf	0	Inf	0.994699
PF3D7_0317100	WE64	1.7e-182	0	Inf	0.995212
PF3D7_1040100	RS152	0.99677	0.149018	6.6673	0.997337
PF3D7_0700400	RS93	0.99533	0.0571457	17.3361	0.997438
PF3D7_0937800_DBLα0.1	DC193	NA	NA	NA	NA
PF3D7_0425800_DBLβ3	DC73	NA	NA	NA	NA
PF3D7_0832400	RS115	NA	NA	NA	NA
PF3D7_1040200	RS154	NA	NA	NA	NA
PF3D7_1452000	WE90.2	NA	NA	NA	NA
