# Supplementary material for: High-Throughput Antibody Profiling Identifies Targets of Protective Immunity against P. falciparum Malaria in Thailand
Source: Biomolecules. 2023 Aug 18;13(8):1267. doi: 10.3390/biom13081267 (PMC10452476; doi:10.3390/biom13081267)
Supplement: Supplementary file 1 [file biomolecules-13-01267-s001.zip › Table S3 (all antigens multivariate).xlsx]

## Sheet: Sheet1
		Table S3: Multivariate analysis of 691 P. falciparum proteins assessed in this study
Gene ID and Domain	Protein ID	OR	Lower CI	Upper CI	p value
PF3D7_1219300_CIDRα3.4	DC239	0.00367257	0.000137357	0.0981951	0.000825025
PF3D7_1150400_DBLβ3	DC217	0.0351409	0.00449808	0.274535	0.00141053
PF3D7_1240300_CIDRα4	DC243	0.000972822	1.31e-05	0.0724055	0.00161052
PF3D7_0412900_CIDRα3.1	DC47	0.00301361	8.03e-05	0.11305	0.00169665
PF3D7_1240600_DBLδ1	DC253	0.00986126	0.000535427	0.181621	0.00188586
PF3D7_0413100_CIDRα3.1	DC51	0.00337065	9.05e-05	0.125487	0.00203768
PF3D7_1035500	WE18	0.0148246	0.00101642	0.216218	0.00206982
PF3D7_1200100_CIDRβ1	DC224	0.0197219	0.00162127	0.239907	0.00207121
PF3D7_1228600	WE45	0.0113866	0.000657943	0.19706	0.00209371
PF3D7_0937800_DBLδ1	DC195	0.00419402	0.000125983	0.13962	0.0022068
PF3D7_0223500_CIDRα3.4	DC15	0.0118393	0.000687634	0.203842	0.00224818
PF3D7_0937800_CIDRα3.1	DC194	0.00243537	5.06e-05	0.117302	0.00233423
PF3D7_1035400	WE14	0.00227096	4.46e-05	0.11566	0.00239994
PF3D7_0421300_DBLα0.24	DC66	0.00206171	3.78e-05	0.112485	0.00243899
PF3D7_0421100_CIDRγ11	DC65	0.00872076	0.000386952	0.19654	0.00284873
PF3D7_0425800_CIDRβ5	DC76	0.0115076	0.000612035	0.216368	0.00285801
PF3D7_1240400_CIDRα3.4	DC248	0.0112954	0.000592329	0.215397	0.00287586
PF3D7_0421100_CIDRα4	DC63	0.00157679	2.25e-05	0.110602	0.00292709
PF3D7_1366400	WE76.2	0.00994338	0.000475258	0.208036	0.0029587
PF3D7_0809100_DBLδ1	DC181	0.00277469	5.69e-05	0.135252	0.00298865
PF3D7_0426000_CIDRβ1	DC80	0.011037	0.000555318	0.219362	0.00313054
PF3D7_0223500_CIDRβ1	DC17	0.0079774	0.000321944	0.19767	0.00317911
PF3D7_0300100_DBLδ1	DC20	0.0225153	0.0018009	0.281491	0.00324367
PF3D7_0800200_DBLγ14	DC162	0.0165139	0.00107287	0.254186	0.00326125
PF3D7_1255200_CIDRα2.3	DC256	0.017331	0.00115841	0.259289	0.00330452
PF3D7_1100200_DBLγ12	DC211	0.00772315	0.000299098	0.199423	0.00336791
PF3D7_0712800_CIDRα2.4	DC143	0.00284308	5.56e-05	0.145454	0.00349716
PF3D7_1100200_CIDRβ4	DC213	0.00735241	0.000271919	0.198802	0.0034973
PF3D7_0809100_CIDRβ1	DC182	0.000837601	7.11e-06	0.098641	0.00359102
PF3D7_0412700_DBLδ1	DC44	0.024979	0.00208299	0.299547	0.00360161
PF3D7_0324900_CIDRβ7	DC25	0.0308569	0.0029113	0.327053	0.00387818
PF3D7_0324900_CIDRα2.1	DC23	0.0205881	0.00147505	0.28736	0.0038867
PF3D7_1100100_CIDRα3.2	DC206	0.000155941	4.05e-07	0.0601106	0.00390831
PF3D7_0808700_CIDRβ1	DC178	0.00903385	0.000367911	0.221821	0.00395038
PF3D7_1255200_DBLδ1	DC257	0.00407664	9.54e-05	0.174114	0.00407152
PF3D7_0600200_DBLβ13	DC95	0.0396361	0.00437152	0.359376	0.00410693
PF3D7_0632500_DBLe2	DC113	0.0260392	0.00214348	0.316327	0.00419135
PF3D7_0533100_CIDRα1.3	DC86	0.00156196	1.87e-05	0.130549	0.00421428
PF3D7_1150400_DBLδ3	DC219	0.028737	0.00252565	0.326971	0.00422251
PF3D7_0712600_CIDRβ1	DC141	0.00448349	0.000109574	0.183452	0.00429663
PF3D7_1373500_DBLδ1	DC272	0.024809	0.00194433	0.316554	0.00443541
PF3D7_1373500_CIDRα3.4	DC271	0.0119159	0.000549304	0.258489	0.00477575
PF3D7_0207600	WE65	0.00908669	0.000345256	0.23915	0.00484066
PF3D7_0101800	RS8	0.00860024	0.000311141	0.23772	0.00497992
PF3D7_0200100_DBLγ11	DC13	0.0501887	0.00620287	0.406087	0.0050345
PF3D7_1200600_DBLe10	DC237	0.0123914	0.000573854	0.267571	0.00509379
PF3D7_1300300_CIDRβ3	DC268	0.0167894	0.000961128	0.293284	0.00510236
PF3D7_1200400_DBLz5	DC229	0.0781736	0.0131314	0.465382	0.00510408
PF3D7_0800300_DBLδ1	DC169	0.0065112	0.00018991	0.22324	0.00524686
PF3D7_0413100_CIDRγ2	DC53	0.0280241	0.00227297	0.345516	0.00528389
PF3D7_0421300_CIDRβ1	DC69	0.013112	0.000618331	0.278048	0.00541275
PF3D7_0733000_CIDRβ1	DC153	0.016523	0.000913031	0.299016	0.00548394
PF3D7_1017100	WE10	0.0130751	0.000612166	0.279269	0.00549226
PF3D7_1476200	PF14.1	0.00213071	2.75e-05	0.165035	0.00557456
PF3D7_0700100_DBLδ1	DC120	0.0017266	1.92e-05	0.155567	0.00560112
PF3D7_0712900_CIDRβ1	DC149	0.016101	0.000861759	0.300829	0.00570655
PF3D7_0712400_DBLγ9	DC137	6.55e-05	7.06e-08	0.0607793	0.00572233
PF3D7_1035300	WE50.1	0.0613033	0.00844219	0.445157	0.00577827
PF3D7_0600200_DBLγ4	DC96	0.0112887	0.000467034	0.272859	0.00579389
PF3D7_0412900_CIDRγ2	DC49	0.0386641	0.00381417	0.391935	0.00591209
PF3D7_0420900_CIDRα3.2	DC59	0.0059558	0.000151963	0.233423	0.00619408
PF3D7_0809100_CIDRα2.2	DC180	0.00748497	0.000224507	0.249547	0.00622202
PF3D7_1240300_CIDRβ1	DC246	0.0204435	0.00125564	0.332849	0.00627982
PF3D7_0711700_CIDRβ6	DC125	0.0285205	0.00221501	0.36723	0.00636486
PF3D7_0420700_CIDRγ6	DC57	0.0261677	0.00190732	0.35901	0.00639727
PF3D7_0220000	WE87.1	0.0113397	0.000451495	0.284805	0.00645625
PF3D7_0412700_CIDRβ1	DC45	0.0235845	0.00156625	0.355135	0.00676448
PF3D7_0425800_CIDRα1.6	DC71	0.0262739	0.00187997	0.367196	0.00683949
PF3D7_0632500_DBLγ1	DC109	0.0195629	0.00112206	0.341076	0.00698512
PF3D7_1219300_CIDRγ12	DC241	0.00577866	0.000135955	0.245618	0.00706236
PF3D7_0700100_CIDRβ1	DC121	0.0174407	0.000908878	0.334675	0.00722729
PF3D7_0606800	WE7	0.0151854	0.000715163	0.322438	0.00723086
PF3D7_0115700_CIDRα2.8	DC8	0.0324691	0.00265765	0.396683	0.00727308
PF3D7_0424100	WE33	0.0173095	0.000891099	0.336235	0.00735945
PF3D7_0421300_DBLδ1	DC68	0.033827	0.00283164	0.404099	0.00745087
PF3D7_0400400_DBLγ11	DC35	0.0115295	0.000438491	0.30315	0.00746101
PF3D7_0412700_CIDRα3.2	DC43	0.00960557	0.00031914	0.289111	0.00748566
PF3D7_0722200	WE56.3	0.035721	0.00310498	0.410951	0.00750548
PF3D7_1116100	WE98.2	0.0358491	0.00312079	0.411805	0.007533
PF3D7_0400400_DBLδ1	DC36	0.0136035	0.000573571	0.322639	0.00780781
PF3D7_1431400	WE68	0.0345014	0.00286506	0.415469	0.00800566
PF3D7_0632500_DBLβ5	DC108	0.00557159	0.000118989	0.260886	0.00817659
PF3D7_1240300_DBLδ1	DC245	0.0118575	0.000442304	0.317882	0.00821669
PF3D7_0712400_DBLα0.18	DC134	0.00185295	1.73e-05	0.198567	0.0083429
PF3D7_0500100_CIDRα2.4	DC82	0.0133997	0.000543601	0.330303	0.00835239
PF3D7_0712800_CIDRγ5	DC145	0.0176584	0.000876245	0.35586	0.00843137
PF3D7_1219300_DBLα0.16	DC238	0.0282465	0.00198386	0.402177	0.00848359
PF3D7_0620400	MSP10_1-1	0.029186	0.00209898	0.405825	0.00850044
PF3D7_0413100_DBLδ1	DC52	0.0325304	0.00253259	0.417843	0.00853918
PF3D7_0712900_CIDRα3.1	DC147	0.0356921	0.00297606	0.428056	0.00855304
PF3D7_0800300_CIDRα1.6	DC166	0.0248487	0.00158098	0.390555	0.00856522
PF3D7_0412900_DBLα0.1	DC46	0.0278415	0.00191587	0.404595	0.00872437
PF3D7_1250200	WE69	0.0176591	0.000862613	0.361512	0.00877887
PF3D7_0400400_DBLγ6	DC34	0.0212518	0.00118235	0.381984	0.00897711
PF3D7_1035700	WE49	0.0316722	0.00236007	0.425042	0.00916669
PF3D7_1200600_DBLpam2	DC232	0.0519611	0.00560382	0.481806	0.00925055
PF3D7_0400400_DBLβ12	DC33	0.0559246	0.00636792	0.491143	0.00928433
PF3D7_0831600	WE81.1	0.0346626	0.00269983	0.445026	0.00983164
PF3D7_1200100_CIDRα2.2	DC222	0.0197514	0.0010013	0.389611	0.00989237
PF3D7_1035900	WE35	0.100701	0.0176001	0.576174	0.00989315
PF3D7_1150400_CIDRγ2	DC220	0.0171149	0.000778026	0.376491	0.00989612
PF3D7_0420900_DBLδ1	DC60	0.00678297	0.000152475	0.301747	0.00991477
PF3D7_0831600	WE81.2	0.0230842	0.00131216	0.406108	0.00999642
PF3D7_0800200_CIDRδ2	DC160	0.0135003	0.000503551	0.361945	0.010298
PF3D7_0600200_DBLe12	DC98	0.0331141	0.00244659	0.448193	0.0103544
PF3D7_0404900	WE22	0.0134039	0.000494786	0.363118	0.0104123
PF3D7_0533100_DBLγ15	DC88	0.0273259	0.00173355	0.430736	0.0105084
PF3D7_1300300_DBLδ5	DC267	0.0138258	0.00051767	0.369257	0.0106362
PF3D7_0833500_CIDRβ1	DC186	0.0161692	0.000682012	0.38334	0.0106607
PF3D7_1133400	WE41	0.0169077	0.000735258	0.388803	0.0107551
PF3D7_0808700_DBLδ1	DC177	0.003089	3.59e-05	0.265771	0.0109899
PF3D7_1000100_DBLδ1	DC199	0.0244132	0.00139348	0.427709	0.0110418
PF3D7_0800200_DBLβ6	DC161	0.0121541	0.000403224	0.366353	0.0111533
PF3D7_0800300_CIDRβ1	DC170	0.0302477	0.00202792	0.451163	0.0111721
PF3D7_1335000	WE21	0.0199958	0.000972522	0.41113	0.0112056
PF3D7_0323400	WE70	0.0249482	0.00143956	0.432361	0.0112079
PF3D7_0617400_DBLα0.21	DC101	0.0398897	0.00330765	0.481064	0.0112118
PF3D7_0500100_DBLδ1	DC83	0.0547523	0.00578882	0.517863	0.0112761
PF3D7_0612800	WE23	0.0560771	0.00601428	0.522862	0.0114301
PF3D7_1150400_DBLβ6	DC218	0.00360455	4.58e-05	0.283835	0.0115589
PF3D7_0426000_CIDRα4	DC78	0.0255647	0.00148356	0.440532	0.0115892
PF3D7_0421300_CIDRα3.4	DC67	0.0118217	0.000375114	0.372558	0.0117068
PF3D7_0937800_CIDRγ5	DC196	0.0390445	0.00312293	0.488156	0.0118543
PF3D7_1041300_CIDRα2.7	DC202	0.0215395	0.00108366	0.428131	0.0118635
PF3D7_0206800	WE3	0.00177197	1.27e-05	0.247407	0.0119274
PF3D7_0733000_CIDRα3.4	DC151	0.0306417	0.00202151	0.46446	0.0119741
PF3D7_1300100_CIDRα2.4	DC260	0.0135734	0.000473913	0.388756	0.0120055
PF3D7_0900100_CIDRγ12	DC190	0.0145811	0.000538144	0.395079	0.0120158
PF3D7_1310700	EH4	0.0278802	0.00169656	0.458165	0.0121933
PF3D7_0600200_CIDRα1.8	DC94	0.0420218	0.00341669	0.516826	0.0133044
PF3D7_1335100	WE16	0.0328243	0.00218141	0.493917	0.0135134
PF3D7_0632500_DBLδ4	DC110	0.0224155	0.00109895	0.457216	0.013561
PF3D7_0800300_DBLγ4	DC168	0.0248398	0.00131877	0.467873	0.013621
PF3D7_0425800_DBLγ13	DC74	0.0396181	0.00304194	0.515984	0.0136915
PF3D7_0620400	MSP10_2-1	0.0568166	0.00580087	0.556491	0.013761
PF3D7_1036000	WE24	0.0840435	0.0117162	0.602867	0.0137628
PF3D7_1300100_CIDRβ1	DC262	0.0383567	0.00284951	0.516313	0.0139571
PF3D7_1434400	WE9	0.011258	0.000311698	0.406622	0.014217
PF3D7_1200400_DBLβ5	DC227	0.0321207	0.00204374	0.504829	0.0144315
PF3D7_0419700	WE12	0.0437873	0.00356219	0.538245	0.0145292
PF3D7_1100200_CIDRγ3	DC210	0.0139161	0.000450667	0.429713	0.0145803
PF3D7_0508000	WE15	0.0328087	0.0021096	0.510244	0.0146635
PF3D7_1100100_DBLδ1	DC207	0.0144365	0.000471859	0.441686	0.0151741
PF3D7_0712300_DBLδ1	DC132	0.00767416	0.00014941	0.39417	0.0153823
PF3D7_0400400_CIDRα1.1	DC32	0.0579421	0.0057862	0.580223	0.0153897
PF3D7_0811600	WE74.1	0.0365201	0.00249743	0.534035	0.0155922
PF3D7_0905400	WE58.1	0.0102448	0.000249468	0.420715	0.0156592
PF3D7_0733000_DBLe4	DC154	0.0199105	0.00082818	0.478673	0.0157731
PF3D7_0425800_DBLδ1	DC75	0.0595234	0.00602074	0.588471	0.0157963
PF3D7_0833500_CIDRα3.1	DC184	0.0342676	0.00221044	0.531236	0.0158516
PF3D7_1100100_CIDRβ1	DC208	0.0371314	0.00254781	0.541146	0.0159865
PF3D7_1366400	WE76.1	0.0195843	0.000797359	0.48102	0.0160362
PF3D7_1200100_DBLα0.9	DC221	0.0276377	0.00148552	0.51419	0.0161302
PF3D7_0808700_CIDRα3.1	DC176	0.0630949	0.00662732	0.600691	0.0162476
PF3D7_0400100_DBLγ5	DC28	0.0464977	0.00380494	0.568219	0.0162787
PF3D7_0302500	WE83.2	0.0705395	0.00807389	0.616285	0.0164984
PF3D7_1200600_DBLpam1	DC231	0.0417679	0.00311313	0.560388	0.0165227
PF3D7_1200600_DBLpam3	DC234	0.000400651	6.64e-07	0.241886	0.0166455
PF3D7_1035600	WE51	0.0551362	0.00512935	0.592667	0.0167685
PF3D7_0620400	WE31	0.0391847	0.0027462	0.559116	0.0169076
PF3D7_1012200	WE5	0.00919105	0.000194643	0.434002	0.0171065
PF3D7_0700100_CIDRα3.1	DC119	0.0405851	0.0029031	0.567377	0.0172594
PF3D7_0620400	MSP10_1-3	0.0142743	0.000431418	0.472293	0.0173037
PF3D7_0632800_CIDRα4	DC115	0.0208836	0.000860798	0.506654	0.0174111
PF3D7_0800100_DBLδ1	DC157	0.0266761	0.00133212	0.534196	0.0177859
PF3D7_0420700_DBLδ1	DC56	0.0373977	0.00246666	0.566995	0.0178336
PF3D7_0412400_CIDRβ1	DC41	0.0280431	0.00145744	0.539588	0.0178398
PF3D7_0420700_CIDRα3.2	DC55	0.0557415	0.00511342	0.60764	0.0178488
PF3D7_0421100_DBLδ1	DC64	0.0199657	0.000781905	0.509818	0.0179066
PF3D7_1420700	WE67	0.0585479	0.0055708	0.615326	0.0180488
PF3D7_0900100_CIDRα3.4	DC188	0.0257362	0.0012367	0.53558	0.0181188
PF3D7_0214900	WE66	0.0153877	0.000478136	0.495219	0.0184341
PF3D7_0808200	WE36	0.0843447	0.0107567	0.661357	0.0185972
PF3D7_0412700_DBLα0.1	DC42	0.0214502	0.000873087	0.526992	0.0186642
PF3D7_0507300	WE59	0.0659257	0.00683221	0.636133	0.0187175
PF3D7_0712600_CIDRα3.1	DC139	0.0567746	0.00518403	0.621786	0.0188189
PF3D7_0808600_CIDRγ2	DC174	0.0132403	0.00035711	0.490899	0.0189766
PF3D7_0400400_CIDRγ8	DC37	0.0510892	0.00424508	0.614853	0.01912
PF3D7_0412400_CIDRα3.1	DC39	0.0483923	0.00382767	0.61181	0.0193057
PF3D7_1240600_CIDRβ1	DC254	0.0460139	0.00346469	0.611102	0.0196363
PF3D7_0712000_CIDRα3.1	DC127	0.0515693	0.00426605	0.623385	0.0197183
PF3D7_1255200_DBLα0.19	DC255	0.00318411	2.52e-05	0.40191	0.0198443
PF3D7_0400100_CIDRα2.10	DC27	0.0637847	0.00626648	0.649245	0.0200788
PF3D7_0711700_CIDRα3.2	DC123	0.0353507	0.00210125	0.59473	0.0202967
PF3D7_1035100	WE34	0.0356342	0.00207828	0.610987	0.0214592
PF3D7_0909600	WE38	0.048138	0.00357821	0.647606	0.0221594
PF3D7_0400100_CIDRβ1	DC30	0.0177363	0.000549914	0.572044	0.0228964
PF3D7_1334800	WE6	0.0687213	0.00680743	0.693745	0.0232091
PF3D7_0800100_CIDRβ1	DC158	0.0333821	0.00175487	0.63501	0.0236872
PF3D7_1028700	WE29	0.076675	0.00825324	0.712333	0.0239284
PF3D7_1219300_DBLδ1	DC240	0.0375126	0.0021548	0.65305	0.0243019
PF3D7_0405900	WE42	0.0724546	0.00731665	0.717497	0.0248454
PF3D7_0100100_DBLδ1	DC3	0.0458824	0.00308542	0.682304	0.0252492
PF3D7_1240600_DBLα0.20	DC251	0.10006	0.0133141	0.751987	0.0252871
PF3D7_0412900_DBLδ1	DC48	0.0426348	0.00267241	0.680183	0.0255669
PF3D7_1200600_DBLepam5	DC236	0.0167797	0.000459161	0.613204	0.0259891
PF3D7_0712000_DBLδ1	DC128	0.0102488	0.000180905	0.580629	0.026152
PF3D7_1255200_CIDRβ1	DC258	0.0294045	0.00129941	0.665394	0.026693
PF3D7_0900100_DBLδ1	DC189	0.0217979	0.000736842	0.644846	0.0268371
PF3D7_0623300	WE53	0.0220351	0.000750079	0.647326	0.0269544
PF3D7_0300100_CIDRα2.4	DC19	0.0531867	0.00395044	0.716078	0.0269832
PF3D7_0833400	RS124	0.0228671	0.000800445	0.653268	0.0271791
PF3D7_0811600	WE74.2	0.0037447	2.61e-05	0.537393	0.0274478
PF3D7_0420900_CIDRγ11	DC61	0.0677326	0.00611358	0.750413	0.0282355
PF3D7_1100200_DBLδ5	DC212	0.038368	0.00208043	0.707595	0.0283366
PF3D7_1320000	WE75.1	0.0350314	0.00174609	0.702826	0.0284892
PF3D7_1252100	WE92.3	0.084814	0.00930966	0.772683	0.0286132
PF3D7_1100200_DBLβ9	DC214	0.0682227	0.00613427	0.758742	0.0289149
PF3D7_1200100_DBLδ1	DC223	0.0218432	0.000691978	0.689507	0.0299247
PF3D7_0712300_CIDRγ10	DC133	0.0442114	0.00264216	0.739793	0.030032
PF3D7_0100100_CIDRβ1	DC4	0.0637091	0.00527249	0.769817	0.0303288
PF3D7_0324900_DBLα0.9	DC22	0.0137121	0.000280965	0.669197	0.0305795
PF3D7_0833500_DBLδ1	DC185	0.0258311	0.000939057	0.710548	0.0306124
PF3D7_0410700	WE60	0.025399	0.00089695	0.719226	0.0313025
PF3D7_0800100_CIDRα2.11	DC156	0.0352502	0.00165819	0.749356	0.0319517
PF3D7_0712400_CIDRα6	DC135	0.0513577	0.00338903	0.778278	0.0322946
PF3D7_0502500	WE54	0.0294157	0.00115323	0.750311	0.0328563
PF3D7_0620400	MSP10_full	0.0306615	0.00122021	0.770461	0.0341301
PF3D7_0220000	WE87.2	0.0784259	0.00734782	0.837068	0.0350983
PF3D7_1240400_CIDRβ1	DC250	0.096853	0.010859	0.863843	0.036519
PF3D7_0632800_CIDRβ1	DC117	0.0414134	0.00208291	0.823402	0.0368537
PF3D7_1200400_CIDRα5	DC226	0.0110407	0.000160284	0.760511	0.0369081
PF3D7_0533100_DBLα1.4	DC85	0.0226114	0.000640964	0.797668	0.0371285
PF3D7_0200100_CIDRα2.2	DC12	0.028847	0.00102283	0.813578	0.0374256
PF3D7_0400100_DBLδ	DC29	0.0543957	0.0034941	0.846826	0.0376445
PF3D7_0506900	WE44	0.0456725	0.00248146	0.840627	0.0378177
PF3D7_1469200	WE19	0.0244345	0.000721366	0.827661	0.0388998
PF3D7_0712600_DBLδ1	DC140	0.0196744	0.000472828	0.818653	0.038905
PF3D7_1240400_DBLα0.16	DC247	0.000186385	5.23e-08	0.663821	0.0395707
PF3D7_0412400_DBLδ1	DC40	0.0396003	0.00182293	0.860254	0.0397979
PF3D7_0731500	WE86.2	0.122891	0.0166386	0.907665	0.0398826
PF3D7_0711000	WE73.1	0.0954303	0.0100577	0.905472	0.0407073
PF3D7_0423800	WE20	0.0990557	0.0106095	0.924837	0.0425035
PF3D7_1200400_DBLe4	DC230	0.024506	0.000679012	0.884436	0.0426501
PF3D7_0800300_DBLβ1	DC167	5.95e-10	7.1e-19	0.499447	0.0427418
PF3D7_0712800_DBLα0.9	DC142	0.0143661	0.000236911	0.871142	0.0427784
PF3D7_0426000_DBLδ1	DC79	0.052628	0.0029902	0.926262	0.0441832
PF3D7_1400400	RS215	26.2103	1.05973	648.257	0.0459945
PF3D7_1200600_CIDRpam	DC233	0.0311337	0.00102398	0.946611	0.0464266
PF3D7_0617400_CIDRβ1	DC105	0.0971981	0.00979325	0.964692	0.046514
PF3D7_0712300_CIDRα0.1	DC131	0.103731	0.0111111	0.968421	0.0467946
PF3D7_0310400	WE77	0.065451	0.00444505	0.963732	0.046931
PF3D7_1218000	WE17	0.0573021	0.00337997	0.971466	0.0476984
PF3D7_0425800_DBLβ3	DC72	0.0587273	0.00354264	0.973538	0.0478477
PF3D7_0502400	WE37	0.0669547	0.00452531	0.990636	0.0492012
PF3D7_0421100_DBLα0.8	DC62	0.0575468	0.00333676	0.992469	0.0493907
PF3D7_0712900_DBLδ1	DC148	0.035683	0.00127661	0.997385	0.049816
PF3D7_1000100_DBLα0.20	DC197	0.0144905	0.00020464	1.02606	0.0513954
PF3D7_1476200	PF14.2	0.00225868	4.71e-06	1.0833	0.0530401
PF3D7_0324900_DBLδ1	DC24	0.051574	0.00253956	1.04738	0.0536231
PF3D7_1136900	WE78.1	0.0180877	0.000306906	1.06601	0.053698
PF3D7_1300300_DBLβ9	DC269	0.0408127	0.00158139	1.0533	0.0537693
PF3D7_0808700_DBLα0.2	DC175	0.0530014	0.00264302	1.06285	0.0548386
PF3D7_0620400	MSP10_1-2	0.113328	0.0122427	1.04906	0.0551342
PF3D7_0300100_CIDRβ1	DC21	0.0573982	0.00305557	1.07821	0.0561748
PF3D7_0632500_DBLe7	DC112	0.0197318	0.000330841	1.17684	0.0598445
PF3D7_0712300_DBLα0.1	DC130	0.147163	0.0199848	1.08367	0.0599555
PF3D7_1136900	WE78.2	0.0732819	0.00479769	1.11934	0.0602519
PF3D7_1000100_CIDRα3.1	DC198	0.0936151	0.00782615	1.11981	0.0613963
PF3D7_0412400_DBLα0.17	DC38	0.0153281	0.000191002	1.2301	0.0618405
PF3D7_0115700_DBLδ1	DC9	0.0569394	0.00277643	1.16772	0.0629709
PF3D7_1240300_DBLα0.7	DC242	0.0753317	0.0048217	1.17694	0.065208
PF3D7_1036300	WE46	0.00696043	3.43e-05	1.41313	0.0668863
PF3D7_1476200	PF14.3	0.0191727	0.000273802	1.34255	0.0681346
PF3D7_0424200	WE89	0.0652337	0.00347236	1.22552	0.0681359
PF3D7_0201300	RS27	0.0462006	0.00169204	1.26149	0.0684055
PF3D7_0500100_CIDRβ1	DC84	0.0883233	0.00646797	1.2061	0.0688351
PF3D7_1300300_DBLγ12	DC266	0.0602396	0.00292024	1.24264	0.0688623
PF3D7_0935800	WE79.2	6.62e-05	2.07e-09	2.11381	0.0689805
PF3D7_0808600_DBLδ1	DC173	0.0359759	0.000996482	1.29883	0.069201
PF3D7_0828800	WE43	0.105109	0.00911616	1.2119	0.0709294
PF3D7_0425800_DBLα1.4	DC70	0.00339811	6.73e-06	1.71539	0.0734431
PF3D7_0617400_DBLδ1	DC104	0.0325607	0.000737922	1.43674	0.0763199
PF3D7_0115700_CIDRβ1	DC10	0.215887	0.0392573	1.18722	0.0779553
PF3D7_1000100_CIDRγ4	DC200	0.0355803	0.00086081	1.47066	0.0789406
PF3D7_0712400_DBLβ6	DC136	0.0360699	0.000884914	1.47025	0.0790454
PF3D7_0800300_DBLα2	DC165	0.045273	0.00142494	1.4384	0.0794334
PF3D7_0300400	RS40	0.095492	0.00690436	1.32072	0.0796973
PF3D7_0212600	WE4	0.0645125	0.00299574	1.38926	0.080105
PF3D7_0632500_CIDRγ1	DC111	0.0766531	0.00428105	1.37249	0.0810024
PF3D7_0104200	WE27	0.0584318	0.00234443	1.45634	0.0834732
PF3D7_0632500_CIDRα3.2	DC107	0.205277	0.0339305	1.24191	0.0846904
PF3D7_0712800_DBLδ1	DC144	0.0259552	0.000395607	1.70289	0.0871524
PF3D7_0707300	WE48	0.121839	0.0107587	1.37978	0.0891277
PF3D7_1364100	WE47	0.0613585	0.00244375	1.54061	0.0896597
PF3D7_0711700_DBLδ1	DC124	0.071302	0.00337197	1.50772	0.0898358
PF3D7_1240400_DBLδ1	DC249	0.111977	0.00883375	1.41942	0.091086
PF3D7_0101600	RS7	0.141636	0.0142848	1.40435	0.0949437
PF3D7_0808600_CIDRα3.2	DC172	0.0408448	0.000931298	1.79137	0.0973596
PF3D7_0929400	WE80.2	0.111427	0.00824758	1.50541	0.0985268
PF3D7_1036500	WE52	0.0972013	0.00598871	1.57765	0.101141
PF3D7_1300100_DBLδ1	DC261	0.0601129	0.00205523	1.75822	0.102602
PF3D7_0400100_DBLα0.5	DC26	0.0634293	0.00218078	1.84488	0.108748
PF3D7_0631900	RS80	63.9665	0.394292	10377.3	0.109252
PF3D7_1240600_CIDRα3.1	DC252	0.0898165	0.0046345	1.74064	0.111044
PF3D7_0100300_DBLe8	DC6	0.0675524	0.00242362	1.88285	0.112448
PF3D7_0300100_DBLα0.9	DC18	0.0169317	0.000107804	2.65929	0.113902
PF3D7_0100600	RS3	0.144364	0.0128485	1.62205	0.116857
PF3D7_0800200_DBLz5	DC163	0.021376	0.000169046	2.70302	0.119397
PF3D7_0617400_CIDRα2.1	DC102	0.160772	0.0160114	1.61432	0.120407
PF3D7_0732400	RS103	13.578	0.498674	369.704	0.121799
PF3D7_1255000	RS195	0.000955665	1.29e-07	7.07148	0.126099
PF3D7_0900300	RS126	0.0800205	0.00310565	2.06182	0.127635
PF3D7_0712600_DBLα0.1	DC138	0.0240192	0.000193741	2.9778	0.129446
PF3D7_0712900_DBLα0.20	DC146	0.0391738	0.000592773	2.58882	0.129735
PF3D7_0533100_DBL5	DC89	0.019134	0.000114267	3.20397	0.129946
PF3D7_0413100_DBLα0.1	DC50	0.110332	0.00613715	1.98352	0.134815
PF3D7_0533100_DBLβ1	DC87	0.0958272	0.00436362	2.10441	0.136767
PF3D7_0401200	RS58	0.0730448	0.00218406	2.44294	0.143956
PF3D7_1479600	RS228	28.0218	0.308752	2543.21	0.147321
PF3D7_0533100_DBLe1	DC92	0.111157	0.00553159	2.23368	0.151279
PF3D7_1150400_CIDRα1.4	DC216	0.099977	0.00429789	2.32565	0.151483
PF3D7_1300600	RS200	0.100754	0.00434964	2.33383	0.152311
PF3D7_1300300_DBLβ3	DC265	0.177446	0.0165348	1.90428	0.153281
PF3D7_0833500_DBLα0.17	DC183	0.0508195	0.000844333	3.05877	0.154097
PF3D7_1351800	EH15	0.190228	0.0192998	1.87497	0.155157
PF3D7_0420700_DBLα0.1	DC54	0.0219945	0.000108635	4.45308	0.158909
PF3D7_0713000	RS97	0.179134	0.0163673	1.96055	0.158966
PF3D7_0832900	RS119	0.0715205	0.00178165	2.87104	0.161464
PF3D7_0201200	RS25	7.74656	0.439207	136.631	0.162082
PF3D7_1463900	WE71	0.00532179	3.34e-06	8.46871	0.163915
PF3D7_1301800	RS239	16.174	0.304366	859.484	0.169702
PF3D7_1041300_DBLδ1	DC203	0.0968947	0.00345919	2.71409	0.169822
PF3D7_0200100_DBLα0.7	DC11	0.28006	0.0454168	1.72697	0.170276
PF3D7_0832500	RS117	0.0791996	0.00209233	2.99789	0.171377
PF3D7_0905400	WE58.2	0.0429959	0.000467372	3.95542	0.172582
PF3D7_0600400_DBLe8	DC100	0.0947812	0.00319855	2.80861	0.172967
PF3D7_0937600_DBLe8	DC192	0.090977	0.00283884	2.91556	0.175386
PF3D7_0223500_DBLδ1	DC16	0.09528	0.00313127	2.89923	0.177292
PF3D7_0426000_DBLα0.14	DC77	0.0445759	0.000477006	4.16559	0.179062
PF3D7_1252100	WE92.1	0.121072	0.00552839	2.65148	0.179994
PF3D7_1480000	RS234	9.86998	0.343944	283.234	0.18128
PF3D7_1200400_DBLα0.18	DC225	0.0773142	0.00180745	3.30714	0.181602
PF3D7_0423900	EH14	11.2812	0.314918	404.125	0.184456
PF3D7_1400300	RS213	10.2031	0.323125	322.178	0.18729
PF3D7_0632800_DBLα0.8	DC114	0.0183837	4.54e-05	7.44127	0.191985
PF3D7_0222500	RS29	9.09821	0.326711	253.366	0.193287
PF3D7_0204100	WE93.1	6.67453	0.379404	117.419	0.194442
PF3D7_0901400	RS137	0.0562917	0.000727903	4.35327	0.194647
PF3D7_1206000	WE8	0.0968468	0.0028393	3.30338	0.194825
PF3D7_0800200_DBLα1.6	DC159	0.156958	0.00954255	2.58169	0.194927
PF3D7_1125800	EH10	0.0461965	0.000440127	4.84886	0.195298
PF3D7_1254300	RS186	36.1538	0.152868	8550.51	0.198263
PF3D7_1254600	RS190	14.6993	0.235012	919.404	0.202755
PF3D7_0901000	RS133	0.100463	0.00291654	3.46053	0.203181
PF3D7_0800500	RS110	28.8401	0.16235	5123.21	0.203346
PF3D7_0600200_DBLα2	DC93	0.0863509	0.0019252	3.8731	0.206871
PF3D7_0200600	RS21	0.131906	0.00551073	3.15733	0.211177
PF3D7_1200400_DBLγ14	DC228	0.096689	0.0024722	3.78156	0.211691
PF3D7_0700300	RS91	0.130386	0.00525737	3.23364	0.213648
PF3D7_0711700_DBLα0.1	DC122	0.0922222	0.0021493	3.95707	0.213941
PF3D7_0733000_DBLδ1	DC152	0.150895	0.00758768	3.00081	0.215095
PF3D7_1412000	WE11	0.222634	0.0200022	2.47803	0.221751
PF3D7_0732000	RS98	9.45036	0.253934	351.703	0.223531
PF3D7_1477600	RS242	8.97046	0.261359	307.888	0.223922
PF3D7_1105300	WE55	0.144585	0.00637287	3.28028	0.224682
PF3D7_1452000	WE90.1	0.11013	0.00305895	3.96494	0.227587
PF3D7_1014100	WE85.1	0.281873	0.0349253	2.27492	0.234624
PF3D7_1101300	RS172	0.160185	0.00773749	3.3162	0.23618
PF3D7_0402200	RS256	0.205379	0.0149437	2.82264	0.236455
PF3D7_1116000	WE98.1	0.223345	0.0183855	2.71316	0.239361
PF3D7_1200300	RS179	7.67819	0.255924	230.36	0.240142
PF3D7_0819600	EH7	0.120244	0.00348843	4.1447	0.240882
PF3D7_0700300	RS90	0.217571	0.0170008	2.7844	0.240927
PF3D7_0420900_DBLα0.1	DC58	0.163382	0.0078158	3.41536	0.24278
PF3D7_1373300	RS210	7.71653	0.248211	239.896	0.243892
PF3D7_1479600	RS229	0.208764	0.0146292	2.97914	0.248054
PF3D7_0809100_DBLα0.12	DC179	0.0659924	0.000649757	6.70251	0.248907
PF3D7_0930300	EH31.1	0.358681	0.0623391	2.06374	0.250777
PF3D7_0112900	EH17	0.059811	0.000478894	7.47005	0.252809
PF3D7_0832000	RS114	8.56182	0.215457	340.23	0.253055
PF3D7_0730800	EH39	0.214035	0.0151007	3.03371	0.254449
PF3D7_1436300	WE63	0.330872	0.0489895	2.23469	0.256417
PF3D7_0200700	RS22	0.114593	0.0027161	4.83472	0.256522
PF3D7_0402100	EH9	5.19504	0.300823	89.7154	0.256971
PF3D7_0800700	RS251	6.79315	0.240068	192.225	0.261274
PF3D7_0223400	RS37	8.53877	0.198084	368.079	0.26406
PF3D7_0115700_DBLα0.5	DC7	0.22261	0.0159171	3.11334	0.264336
PF3D7_0808900	RS112	0.106747	0.00196787	5.79046	0.27218
PF3D7_1100200_DBLα1.5	DC209	0.120803	0.00274092	5.32423	0.273849
PF3D7_0937600_DBLα1.3	DC191	0.0768821	0.00075772	7.80085	0.276395
PF3D7_0221400	RS28	7.4693	0.185534	300.701	0.286183
PF3D7_1200600_DBLepam4	DC235	105.08	0.0175067	630721	0.294333
PF3D7_0324800	RS50	0.152011	0.00444124	5.20293	0.295991
PF3D7_0101000	RS6	0.294295	0.0295402	2.93191	0.297
PF3D7_0100400	RS2	4.04599	0.286596	57.1189	0.300761
PF3D7_1400700	RS220	0.136927	0.00307354	6.10012	0.304674
PF3D7_0324400	RS44	0.174865	0.00622675	4.9107	0.305477
PF3D7_0833200	RS123	0.259786	0.0197091	3.42424	0.305613
PF3D7_0700500	RS94	0.179011	0.00664343	4.82355	0.305988
PF3D7_0900500	RS128	36.1247	0.0326451	39975.1	0.315833
PF3D7_0831100	RS244	0.208908	0.00968908	4.5043	0.317595
PF3D7_0617400_DBLβ4	DC103	0.267052	0.0193965	3.67678	0.323726
PF3D7_0113100	RS266	0.224755	0.0115721	4.36521	0.323984
PF3D7_0300400	RS39	3.90052	0.252705	60.2047	0.329642
PF3D7_1400800	RS221	0.198064	0.00761883	5.14901	0.330011
PF3D7_0100100_CIDRα2.8	DC2	0.331106	0.0358143	3.0611	0.330022
PF3D7_1254700	RS192	11.1751	0.0844083	1479.52	0.332901
PF3D7_0733000_DBLα0.16	DC150	7.2e-14	1.11e-40	46900000000000	0.336705
PF3D7_0100900	RS5	0.354461	0.0426147	2.94834	0.337253
PF3D7_1040500	RS157	0.170105	0.00451186	6.41323	0.338817
PF3D7_0115300	RS12	0.268172	0.0179362	4.00957	0.34023
PF3D7_0402200	RS259	5.87782	0.1514	228.195	0.342743
PF3D7_0114700	RS10	3.16224	0.291333	34.3242	0.343997
PF3D7_1254400	RS188	0.205663	0.00776711	5.44568	0.344093
PF3D7_0201000	RS23	4.45904	0.191112	104.039	0.352251
PF3D7_0400900	RS56	4.29167	0.198378	92.8452	0.353041
PF3D7_0222800	RS33	6.59557	0.122468	355.208	0.353661
PF3D7_0832900	RS120	0.251218	0.0132347	4.76856	0.357642
PF3D7_0424600	EH18	0.257686	0.0132861	4.99785	0.37005
PF3D7_0900700	RS130	0.208501	0.00673384	6.45584	0.3707
PF3D7_0930300	EH31	0.366171	0.0397466	3.37339	0.375206
PF3D7_0100800	RS4	0.434118	0.0681291	2.7662	0.37716
PF3D7_1400500	RS217	4.26266	0.170676	106.46	0.377169
PF3D7_0631800	RS79	5.32167	0.129903	218.01	0.377478
PF3D7_0424400	RS254	0.153614	0.00230883	10.2204	0.381741
PF3D7_0500100_DBLα0.11	DC81	0.17253	0.00329904	9.02277	0.384086
PF3D7_1372800	RS206	0.133462	0.00141438	12.5937	0.385346
PF3D7_0424400	RS252	0.21382	0.00655647	6.97314	0.385579
PF3D7_1001700	EH11	4.03981	0.171743	95.0262	0.386185
PF3D7_0400400_DBLα1.2	DC31	3.72e-09	3.17e-28	43667371523	0.38628
PF3D7_0800200_DBLe4	DC164	0.129479	0.00125892	13.3168	0.387165
PF3D7_0500500	RS70	3.94581	0.175695	88.6165	0.387248
PF3D7_1373000	RS208	188.56	0.00119928	2.96469e+07	0.390759
PF3D7_0700400	RS92	0.139576	0.00150258	12.9654	0.394368
PF3D7_1000600	RS150	0.316241	0.0223547	4.47369	0.394401
PF3D7_1310200	WE1	5.85856	0.10013	342.782	0.394468
PF3D7_1000600	RS149	5.47991	0.106345	282.378	0.397684
PF3D7_1301800	RS238	0.24126	0.00890731	6.53467	0.398241
PF3D7_0937700	RS144	0.20608	0.00525266	8.08522	0.398864
PF3D7_1101300	RS171	4.5513	0.131127	157.971	0.402376
PF3D7_0424400	RS255	0.222155	0.00641258	7.69628	0.405561
PF3D7_1150200	RS176	3.96137	0.154162	101.792	0.405903
PF3D7_0425500	RS66	27.8326	0.0107504	72058	0.406799
PF3D7_0830800	RS247	0.239828	0.00796554	7.2208	0.411109
PF3D7_0424400	RS253	3.36568	0.185363	61.1113	0.411926
PF3D7_0715200	WE91.1	0.191702	0.00364614	10.079	0.413873
PF3D7_0617600	RS76	4.6503	0.116255	186.016	0.414153
PF3D7_1254800	RS193	0.350443	0.0282549	4.34652	0.414378
PF3D7_0632200	RS84	0.101969	0.000403791	25.7501	0.418531
PF3D7_0200400	RS236	4.01046	0.136298	118.005	0.420838
PF3D7_0732400	RS104	3.71775	0.151221	91.4005	0.421541
PF3D7_0402200	RS258	0.277229	0.0118263	6.49874	0.425386
PF3D7_1400300	RS214	0.265958	0.0102166	6.92343	0.425777
PF3D7_1040000	RS151	3.42839	0.161335	72.854	0.429457
PF3D7_1400200	RS212	3.97106	0.128359	122.853	0.430948
PF3D7_0223200	RS36	0.250574	0.00771141	8.1421	0.435826
PF3D7_0324500	RS46	0.417853	0.0461541	3.78301	0.43756
PF3D7_1404800	EH37	4.03408	0.118555	137.268	0.438303
PF3D7_1373500_CIDRβ6	DC273	0.244009	0.00679231	8.76585	0.440143
PF3D7_0800400	RS109	0.330073	0.0197099	5.52756	0.440765
PF3D7_1240300_DBLβ8	DC244	0.351239	0.0245309	5.02912	0.441001
PF3D7_1000500	RS148	4.80415	0.0880085	262.246	0.441844
PF3D7_0732700	RS107	2.66465	0.216755	32.7574	0.443913
PF3D7_0700200	RS89	0.35892	0.0260227	4.95041	0.444074
PF3D7_0400500	RS52	3.71959	0.128567	107.612	0.44418
PF3D7_0833100	RS122	2.86713	0.192704	42.6584	0.44448
PF3D7_1150300	RS177	2.99905	0.178891	50.278	0.445135
PF3D7_1372800	RS207	0.27158	0.00948702	7.77439	0.446264
PF3D7_1479500	RS227	0.271314	0.00937297	7.85355	0.447425
PF3D7_1000200	RS145	3.32146	0.145641	75.7489	0.451806
PF3D7_0732200	RS101	3.50909	0.125441	98.1635	0.460147
PF3D7_1101200	RS170	0.270987	0.00846474	8.67529	0.46032
PF3D7_1041300_DBLα0.9	DC201	0.182666	0.0019293	17.2948	0.464005
PF3D7_0401000	RS57	3.14994	0.144064	68.8729	0.466003
PF3D7_0935800	WE79.1	0.0514077	1.72e-05	154.058	0.467427
PF3D7_0514200	WE57	0.133863	0.000580834	30.8512	0.468751
PF3D7_1041300_CIDRβ1	DC204	0.309429	0.0127457	7.51204	0.47101
PF3D7_1040400	RS156	0.304022	0.0117584	7.86071	0.473067
PF3D7_0507500	EH26	0.314166	0.0131864	7.48501	0.474165
PF3D7_1100400	RS166	0.419352	0.038808	4.53143	0.474202
PF3D7_0109000	EH6	0.294828	0.0102716	8.46252	0.475786
PF3D7_0100300_DBLα1.3	DC5	0.377743	0.0255504	5.58462	0.478691
PF3D7_1140400	EH30	13.1201	0.010502	16391	0.479202
PF3D7_1027300	EH3	0.23316	0.00405471	13.4075	0.481229
PF3D7_0901500	RS138	0.327121	0.0144864	7.38683	0.482293
PF3D7_1254600	RS191	0.308188	0.0107072	8.87064	0.492302
PF3D7_1041100	RS163	0.389069	0.025765	5.8752	0.495522
PF3D7_0832400	RS116	0.337545	0.0144502	7.88479	0.499322
PF3D7_0900900	RS131	0.232475	0.00335163	16.1248	0.49997
PF3D7_0300700	RS42	2.86941	0.13385	61.5131	0.500282
PF3D7_0900200	RS125	2.62909	0.15619	44.2544	0.502184
PF3D7_0220800	WE84.1	2.93067	0.12664	67.8206	0.502339
PF3D7_0800700	RS250	2.38961	0.187391	30.4722	0.502406
PF3D7_1002100	EH29	2.26529	0.203778	25.182	0.50576
PF3D7_1254000	RS182	0.0278901	7.04e-07	1104.16	0.507509
PF3D7_1373400	RS211	0.32188	0.0109479	9.46365	0.511092
PF3D7_0115000	RS260	0.311309	0.0090455	10.714	0.518027
PF3D7_0401600	RS61	6.95574	0.019209	2518.74	0.51879
PF3D7_0732900	RS108	0.377071	0.0193752	7.33837	0.519585
PF3D7_1100500	RS167	2.75912	0.125141	60.8335	0.520165
PF3D7_1243700	EH13	3.13125	0.0939059	104.41	0.52351
PF3D7_0102500	WE88	0.539483	0.0809765	3.59415	0.523588
PF3D7_0402600	RS62	4.38053	0.0464536	413.08	0.524246
PF3D7_1200200	RS178	0.369423	0.0170533	8.00273	0.525685
PF3D7_0612700	WE13	0.0270429	3.5e-07	2089.99	0.529541
PF3D7_1479900	RS232	0.437658	0.0329104	5.82019	0.531388
PF3D7_0732500	RS105	2.56306	0.133082	49.3629	0.532856
PF3D7_1300500	RS199	0.290668	0.00577027	14.6419	0.53666
PF3D7_0419400	WE94.2	2.17486	0.183353	25.7972	0.538083
PF3D7_0113100	RS267	2.75593	0.105198	72.1983	0.542896
PF3D7_0901100	RS135	0.347192	0.0113409	10.629	0.544508
PF3D7_1300900	RS202	0.405514	0.0216566	7.59314	0.545964
PF3D7_1373100	RS209	3.09495	0.0767627	124.784	0.549179
PF3D7_0901000	RS134	0.406096	0.0207519	7.9469	0.552566
PF3D7_0200200	RS16	0.32853	0.00795235	13.5724	0.557672
PF3D7_1479400	RS225	4.27267	0.0321114	568.511	0.560573
PF3D7_0532900	RS71	2.15167	0.161748	28.6228	0.561701
PF3D7_0830800	RS248	3.47383	0.0486076	248.264	0.567528
PF3D7_0929400	WE80.1	9.92163	0.00378436	26012	0.567744
PF3D7_0808600_DBLα0.15	DC171	0.335851	0.00768663	14.6743	0.571278
PF3D7_1014100	WE85	0.499029	0.0439717	5.66342	0.574898
PF3D7_0533100_DBLγ8	DC90	0.441039	0.025018	7.77501	0.57606
PF3D7_0302500	WE83.1	0.432843	0.0226053	8.28803	0.578246
PF3D7_0632200	RS85	3.39222	0.0454557	253.151	0.578788
PF3D7_0223100	RS34	0.444825	0.0253312	7.8113	0.579537
PF3D7_0324400	RS45	2.61213	0.0874127	78.0578	0.579612
PF3D7_0732300	RS102	2.37369	0.110129	51.162	0.581089
PF3D7_0600400_DBLα1.3	DC99	0.498576	0.0420334	5.91382	0.581252
PF3D7_1373500_DBLα0.16	DC270	0.146957	0.000157281	137.31	0.58266
PF3D7_0425700	RS67	2.08871	0.150184	29.0492	0.583417
PF3D7_1255000	RS194	0.511788	0.0456125	5.74244	0.58711
PF3D7_0100200	RS1	0.490904	0.0373235	6.45669	0.588347
PF3D7_1030200	EH35	0.00201856	3.39e-13	1.20048e+07	0.588916
PF3D7_1477600	RS241	0.401226	0.014471	11.1245	0.59006
PF3D7_1040200	RS153	0.468698	0.0295347	7.43797	0.591067
PF3D7_1150000	RS175	3.08622	0.0505501	188.422	0.591131
PF3D7_1479400	RS224	0.330668	0.00549866	19.8851	0.596482
PF3D7_0831100	RS246	0.310763	0.00399254	24.1886	0.59886
PF3D7_0620400	MSP10_2-2	0.408232	0.0142222	11.7178	0.600916
PF3D7_1253700	RS181	0.491186	0.0335933	7.18189	0.603445
PF3D7_0113600	RS269	0.374496	0.0091189	15.3799	0.604351
PF3D7_1035800	WE40	0.327732	0.0046937	22.8835	0.606583
PF3D7_0600200_DBLz3	DC97	1.94604	0.152828	24.78	0.608016
PF3D7_1400800	RS222	0.486111	0.0304608	7.75765	0.609777
PF3D7_0712000_DBLα0.17	DC126	0.310543	0.00334368	28.8416	0.612969
PF3D7_1040900	RS161	0.499918	0.0330754	7.556	0.616799
PF3D7_0414900	EH8	2.05935	0.120428	35.2156	0.617983
PF3D7_1372700	RS205	0.423608	0.0144694	12.4016	0.618087
PF3D7_0102700	EH16	2.30973	0.0838618	63.6148	0.620707
PF3D7_1041200	RS164	0.457016	0.0203294	10.274	0.621964
PF3D7_1041000	RS162	0.502026	0.0316602	7.96048	0.625035
PF3D7_0400300	RS51	0.371351	0.00665681	20.7158	0.629236
PF3D7_0900600	RS129	2.27467	0.0797749	64.8589	0.630673
PF3D7_0533100_DBLz1	DC91	0.448507	0.0170171	11.8209	0.630973
PF3D7_0632300	RS86	0.45049	0.0161312	12.5806	0.638775
PF3D7_1479900	RS233	0.363768	0.00518501	25.5211	0.641016
PF3D7_0413300	RS64	2.233	0.0701965	71.0331	0.649037
PF3D7_0113600	RS263	1.96786	0.105993	36.5351	0.649698
PF3D7_0937500	RS143	0.494146	0.0234863	10.3967	0.650165
PF3D7_0220800	WE84.2	0.55174	0.0414403	7.34592	0.652544
PF3D7_0201300	RS26	0.585294	0.0565793	6.05468	0.653191
PF3D7_0419400	WE94.1	0.561097	0.0444231	7.08707	0.655172
PF3D7_1100300	RS165	1.64153	0.183862	14.6558	0.65723
PF3D7_1361500	EH21	0.544222	0.0360987	8.20465	0.660285
PF3D7_0532900	RS72	0.555289	0.0400689	7.69538	0.660959
PF3D7_1300200	RS197	0.47133	0.0159403	13.9365	0.66333
PF3D7_0832800	RS118	2.18192	0.0629852	75.5854	0.666206
PF3D7_0600300	RS73	2.16029	0.0633564	73.66	0.668823
PF3D7_0200500	RS20	0.491858	0.0187702	12.8888	0.670227
PF3D7_0631900	RS81	2.23313	0.0538587	92.5914	0.672475
PF3D7_0617700	RS78	0.469191	0.0139559	15.774	0.673057
PF3D7_0632000	RS82	1.64759	0.158976	17.0752	0.67556
PF3D7_1136200	WE39	0.404085	0.00578495	28.2258	0.675769
PF3D7_1254100	RS184	0.490389	0.0170541	14.1011	0.677553
PF3D7_1254300	RS187	0.544013	0.0291955	10.1368	0.683316
PF3D7_0400800	RS55	0.606673	0.0512152	7.18637	0.691911
PF3D7_1301600	WE72	0.0712247	1.4e-07	36196.9	0.693495
PF3D7_1040300	RS155	1.93829	0.0716632	52.4255	0.694053
PF3D7_0715200	WE91.2	0.476875	0.0115109	19.7561	0.696728
PF3D7_1301800	RS240	0.581627	0.0343223	9.85627	0.707421
PF3D7_0700400	RS93	0.546457	0.0228629	13.0611	0.70902
PF3D7_1300100_DBLα0.11	DC259	2.98305	0.00952308	934.42	0.709337
PF3D7_0937400	RS142	0.483505	0.0100554	23.249	0.713052
PF3D7_1040100	RS152	1.53589	0.154764	15.2423	0.714007
PF3D7_1254500	RS189	0.589579	0.0336367	10.334	0.717647
PF3D7_0222700	RS31	0.587268	0.0282329	12.2157	0.73104
PF3D7_1200500	RS180	1.4993	0.147238	15.2672	0.732313
PF3D7_0731500	WE86.1	0.645687	0.0506252	8.23527	0.736287
PF3D7_0201700	EH32	0.712108	0.0972875	5.21237	0.738143
PF3D7_0901600	RS139	1.56465	0.110258	22.2037	0.740812
PF3D7_0901300	RS136	0.576622	0.0215418	15.4348	0.742701
PF3D7_1040600	RS158	0.54607	0.0137451	21.6944	0.747413
PF3D7_0401300	RS59	1.62603	0.0838091	31.5477	0.747965
PF3D7_1400600	RS218	0.59505	0.0243716	14.5286	0.750159
PF3D7_0300800	RS43	1.59273	0.0901064	28.1534	0.75077
PF3D7_1000400	RS147	0.657157	0.0461957	9.34839	0.756616
PF3D7_0324600	RS49	1.56474	0.0915076	26.7562	0.757252
PF3D7_1000300	RS146	0.582991	0.0184978	18.374	0.759224
PF3D7_1129100	WE25	0.630505	0.0318807	12.4695	0.761964
PF3D7_1410400	EH1	0.593541	0.0184854	19.0578	0.768205
PF3D7_1300400	RS198	1.55156	0.0808864	29.7619	0.770703
PF3D7_0632700	RS88	0.630781	0.0251306	15.8327	0.779298
PF3D7_0421200	RS65	0.631461	0.0250305	15.9303	0.780137
PF3D7_0202500	EH28	1.97991	0.0162329	241.488	0.78048
PF3D7_0900400	RS127	0.661365	0.0345567	12.6575	0.783669
PF3D7_0507400	EH33	1.36067	0.150557	12.2972	0.783925
PF3D7_1255100	RS196	1.50351	0.0814508	27.7535	0.783971
PF3D7_0101900	RS9	0.751557	0.0964389	5.85695	0.785131
PF3D7_0617600	RS77	0.644808	0.0257437	16.1507	0.789443
PF3D7_0115000	RS261	1.46645	0.0849189	25.3239	0.792249
PF3D7_0500400	RS69	1.45565	0.0887091	23.886	0.792537
PF3D7_0402200	RS257	2.2481	0.0052705	958.912	0.793173
PF3D7_0223100	RS35	0.655655	0.0272263	15.7893	0.794821
PF3D7_0501600	EH2	1.52051	0.0631754	36.5959	0.796246
PF3D7_0424400	RS268	0.681895	0.0346682	13.4123	0.801113
PF3D7_0201000	RS24	1.43714	0.0794497	25.996	0.806066
PF3D7_0700100_DBLα0.1	DC118	1.73526	0.0173408	173.644	0.814563
PF3D7_1404800	EH36	0.675336	0.0235296	19.3832	0.81872
PF3D7_0222600	RS30	0.704758	0.0347832	14.2794	0.819694
PF3D7_1150400_DBLα1.7	DC215	0.698932	0.0292544	16.6985	0.824914
PF3D7_1400700	RS219	0.649165	0.0136428	30.8892	0.826454
PF3D7_1400400	RS216	1.33787	0.0955307	18.7365	0.828866
PF3D7_1479800	RS231	1.31949	0.10009	17.3947	0.833117
PF3D7_0300200	RS38	1.31683	0.0993001	17.4625	0.834687
PF3D7_0901600	RS140	1.38244	0.0648257	29.4811	0.835667
PF3D7_1030200	EH34	1.3363	0.0860836	20.7437	0.835854
PF3D7_1149900	RS174	1.56065	0.0223978	108.744	0.83713
PF3D7_0808800	RS111	1.35338	0.0736339	24.8748	0.838567
PF3D7_1100500	RS168	1.37288	0.0581035	32.4387	0.844287
PF3D7_0600700	RS75	0.733815	0.0334026	16.121	0.844344
PF3D7_0115400	RS13	0.84044	0.147427	4.79112	0.844812
PF3D7_0632800_DBLδ1	DC116	0.577094	0.0021869	152.287	0.846757
PF3D7_1252100	WE92.2	0.707395	0.0193397	25.8746	0.850486
PF3D7_0600500	RS74	0.719906	0.0220425	23.5121	0.853412
PF3D7_0632100	RS83	0.70407	0.0168188	29.4739	0.853889
PF3D7_0632500_DBLα0.6	DC106	1.18952	0.180613	7.83425	0.85679
PF3D7_1254200	RS185	0.774912	0.0474592	12.6527	0.85797
PF3D7_1040800	RS160	0.761177	0.0357135	16.2233	0.861213
PF3D7_0401400	RS60	0.695079	0.00903077	53.4987	0.869623
PF3D7_0400800	RS54	1.16852	0.172325	7.92364	0.873297
PF3D7_1002100	EH29.1	1.21946	0.105003	14.1623	0.873997
PF3D7_0113600	RS265	1.27832	0.0607886	26.8816	0.874453
PF3D7_0800100_DBLα0.9	DC155	0.516658	0.000142648	1871.29	0.874499
PF3D7_1204900	EH19	1.29858	0.0498744	33.8112	0.87516
PF3D7_0324600	RS48	0.731653	0.0140422	38.1219	0.876892
PF3D7_0830600	EH12	0.808177	0.0528852	12.3503	0.878326
PF3D7_1479500	RS226	0.771044	0.0247628	24.0081	0.882174
PF3D7_0300500	RS41	0.818684	0.0554541	12.0865	0.884197
PF3D7_0732000	RS99	1.16299	0.144652	9.35038	0.887093
PF3D7_0113600	RS264	0.728167	0.00667028	79.491	0.894596
PF3D7_1300900	RS203	0.803452	0.0310797	20.7703	0.895079
PF3D7_0732200	RS100	1.21371	0.0675294	21.8142	0.895452
PF3D7_0222800	RS32	1.2491	0.0377095	41.3755	0.900882
PF3D7_0808900	RS113	0.815711	0.0327672	20.3064	0.901161
PF3D7_0900900	RS132	0.88701	0.133646	5.88709	0.901185
PF3D7_0115200	RS11	1.20555	0.0465316	31.2335	0.910365
PF3D7_0701800	RS96	0.788534	0.0121608	51.1302	0.911128
PF3D7_1372600	RS204	0.854911	0.054217	13.4805	0.911298
PF3D7_1353200	EH23	0.888775	0.100952	7.82474	0.915387
PF3D7_1320000	WE75.2	1.14085	0.0832015	15.6431	0.921423
PF3D7_0400700	RS53	1.13172	0.0909905	14.076	0.923353
PF3D7_0632400	RS87	1.18177	0.038665	36.1199	0.923744
PF3D7_0318700	EH20	1.24386	0.00782899	197.621	0.932746
PF3D7_1102800	EH27	0.829242	0.0104053	66.0861	0.933197
PF3D7_0701100	RS95	1.11503	0.0628626	19.7781	0.940841
PF3D7_0900100_DBLα0.16	DC187	1.24201	0.00377114	409.055	0.941585
PF3D7_0200400	RS235	0.894607	0.0375531	21.3117	0.945112
PF3D7_1148900	EH22	1.06948	0.145497	7.86122	0.947378
PF3D7_1477600	RS243	0.890299	0.0263476	30.0836	0.948414
PF3D7_0204100	WE93.2	0.87221	0.0124346	61.1802	0.94973
PF3D7_1300700	RS201	1.1143	0.0354091	35.0664	0.950958
PF3D7_0833000	RS121	1.11262	0.0330016	37.5109	0.952588
PF3D7_0831100	RS245	1.09463	0.053141	22.5477	0.953289
PF3D7_1479700	RS230	1.0821	0.072163	16.2262	0.954456
PF3D7_1149800	RS173	0.898625	0.0166184	48.5922	0.958128
PF3D7_0425900	RS68	0.955746	0.173118	5.27647	0.958588
PF3D7_0732700	RS106	1.04805	0.0613552	17.9024	0.974144
PF3D7_0115000	RS262	1.05065	0.033701	32.7548	0.977538
PF3D7_1352900	EH38	1.04209	0.055017	19.7385	0.978082
PF3D7_0115600	RS15	0.9574	0.0304033	30.1486	0.980267
PF3D7_0324500	RS47	1.0438	0.0342032	31.8545	0.980388
PF3D7_1446600	EH5	1.04705	0.0165247	66.3445	0.98267
PF3D7_0413200	RS63	1.03098	0.0277965	38.2396	0.986794
PF3D7_1300300_CIDRδ1	DC264	0.97847	0.0708624	13.5107	0.987035
PF3D7_1040700	RS159	0.979289	0.0478054	20.0607	0.989162
PF3D7_1141800	EH24	1.01028	0.165631	6.16225	0.991158
PF3D7_1100100_DBLα0.15	DC205	0	0	Inf	0.993327
PF3D7_0115400	RS14	Inf	0	Inf	0.993384
PF3D7_0920700	EH25	4.34e+55	0	Inf	0.994051
PF3D7_0937300	RS141	9.66e+122	0	Inf	0.994051
PF3D7_1101100	RS169	2e+86	0	Inf	0.994051
PF3D7_1300300_DBLα1.6	DC263	9.01e-19	0	Inf	0.99428
PF3D7_1301800	RS237	1.00943	0.0679174	15.0029	0.994559
PF3D7_0317100	WE64	2.24e-197	0	Inf	0.995068
PF3D7_0100100_DBLα0.11	DC1	1e+76	0	Inf	0.995152
PF3D7_0937800_DBLα0.1	DC193	NA	NA	NA	NA
PF3D7_0425800_DBLβ3	DC73	NA	NA	NA	NA
PF3D7_0832400	RS115	NA	NA	NA	NA
PF3D7_1040200	RS154	NA	NA	NA	NA
PF3D7_1452000	WE90.2	NA	NA	NA	NA
